# Supplementary material for: Pan-Cancer Analysis of IGF-1 and IGF-1R as Potential Prognostic Biomarkers and Immunotherapy Targets
Source: PubMed Central journal article supplement (PMC8602838; doi:10.3389/fonc.2021.755341), 2021-11-05

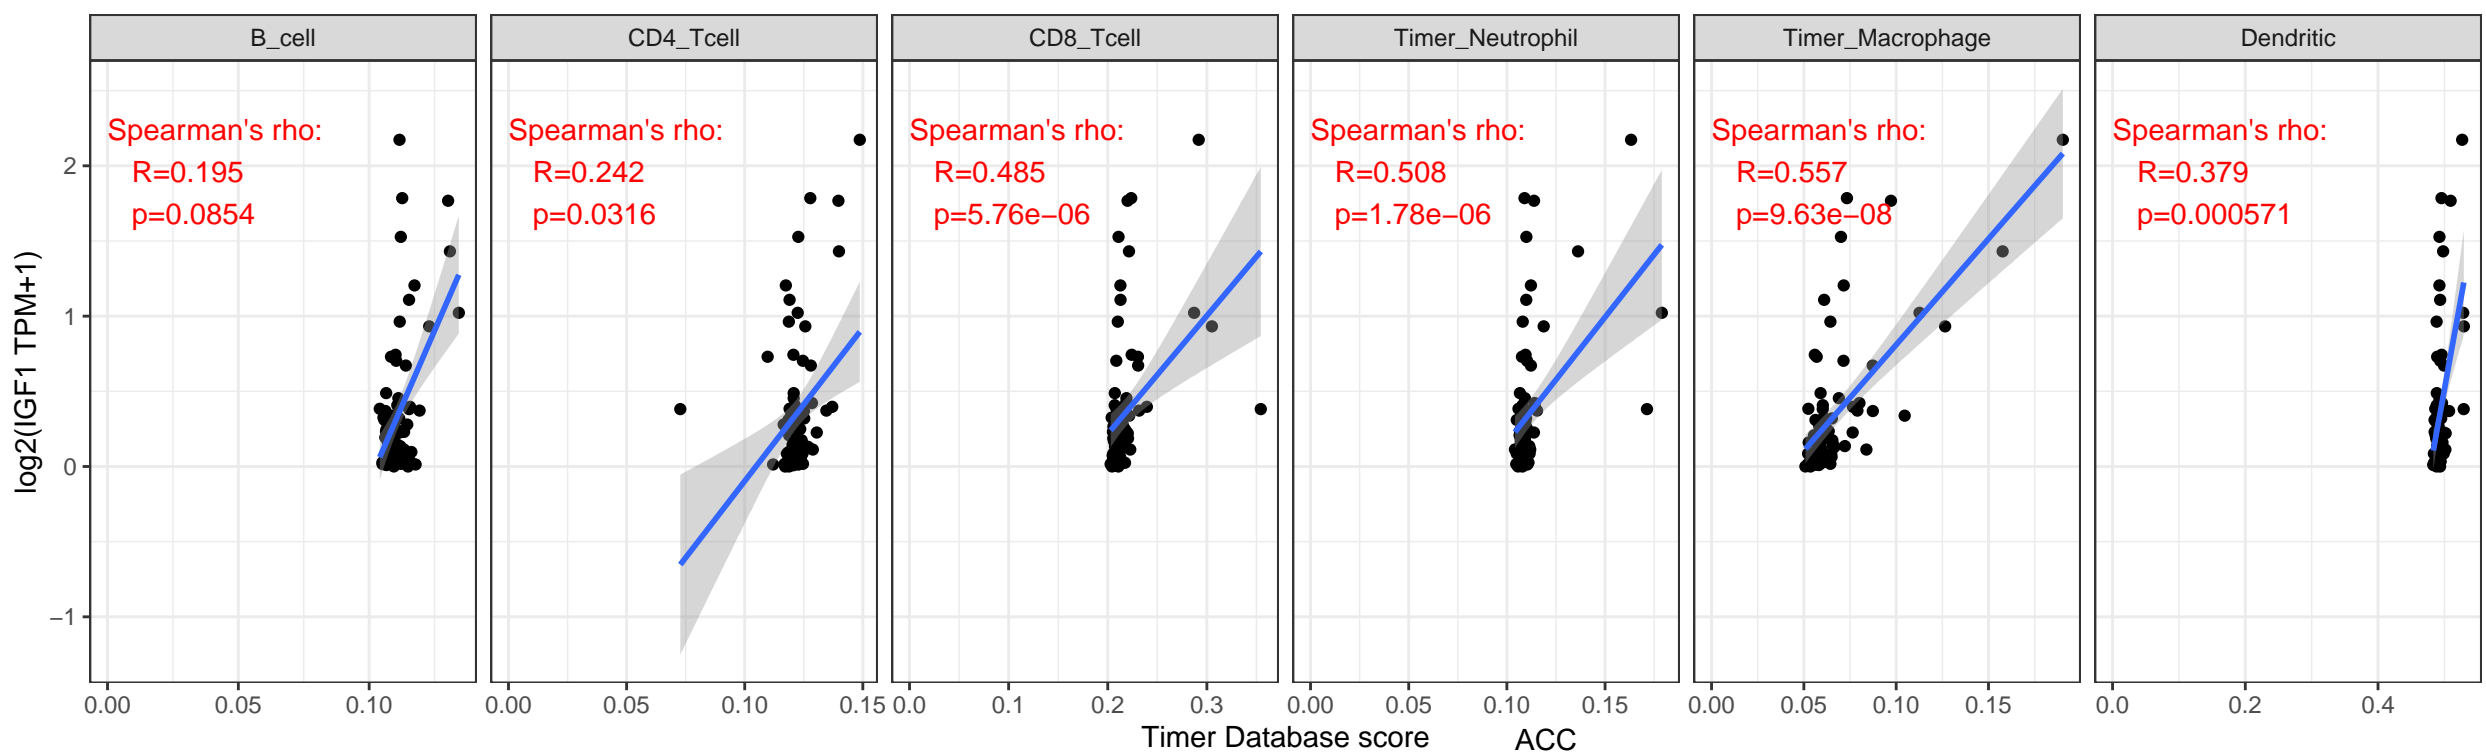

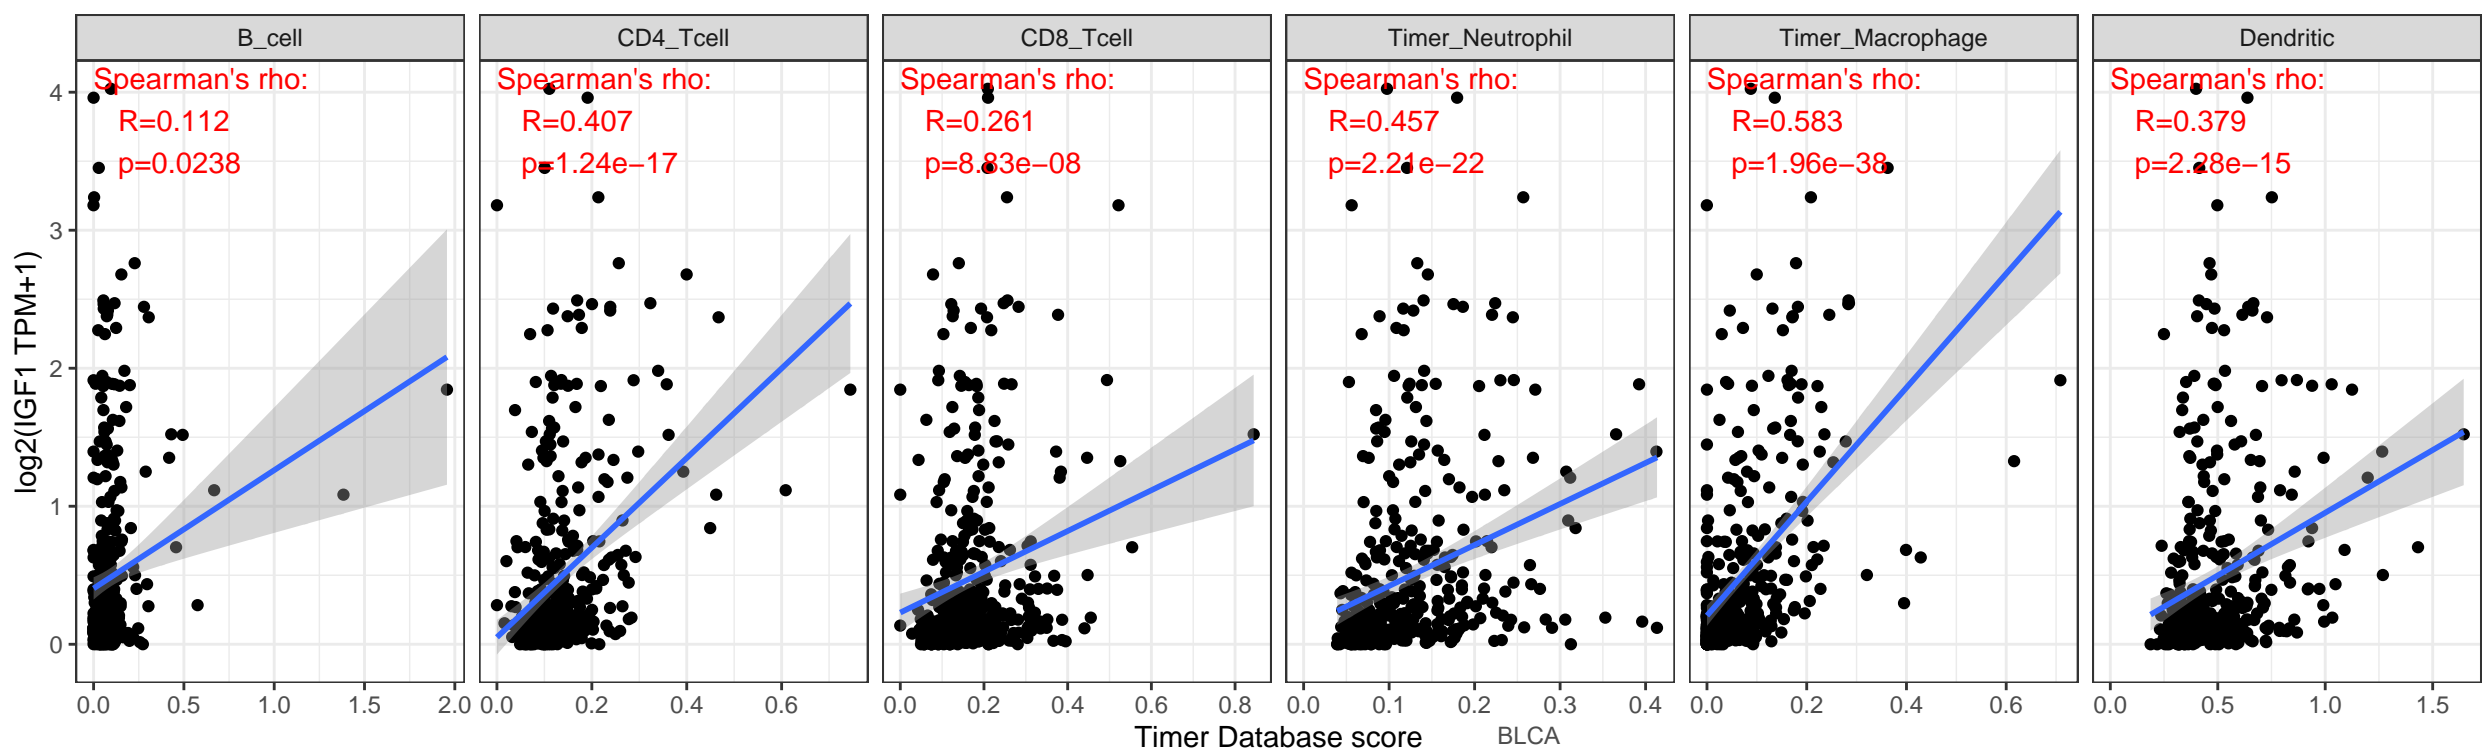

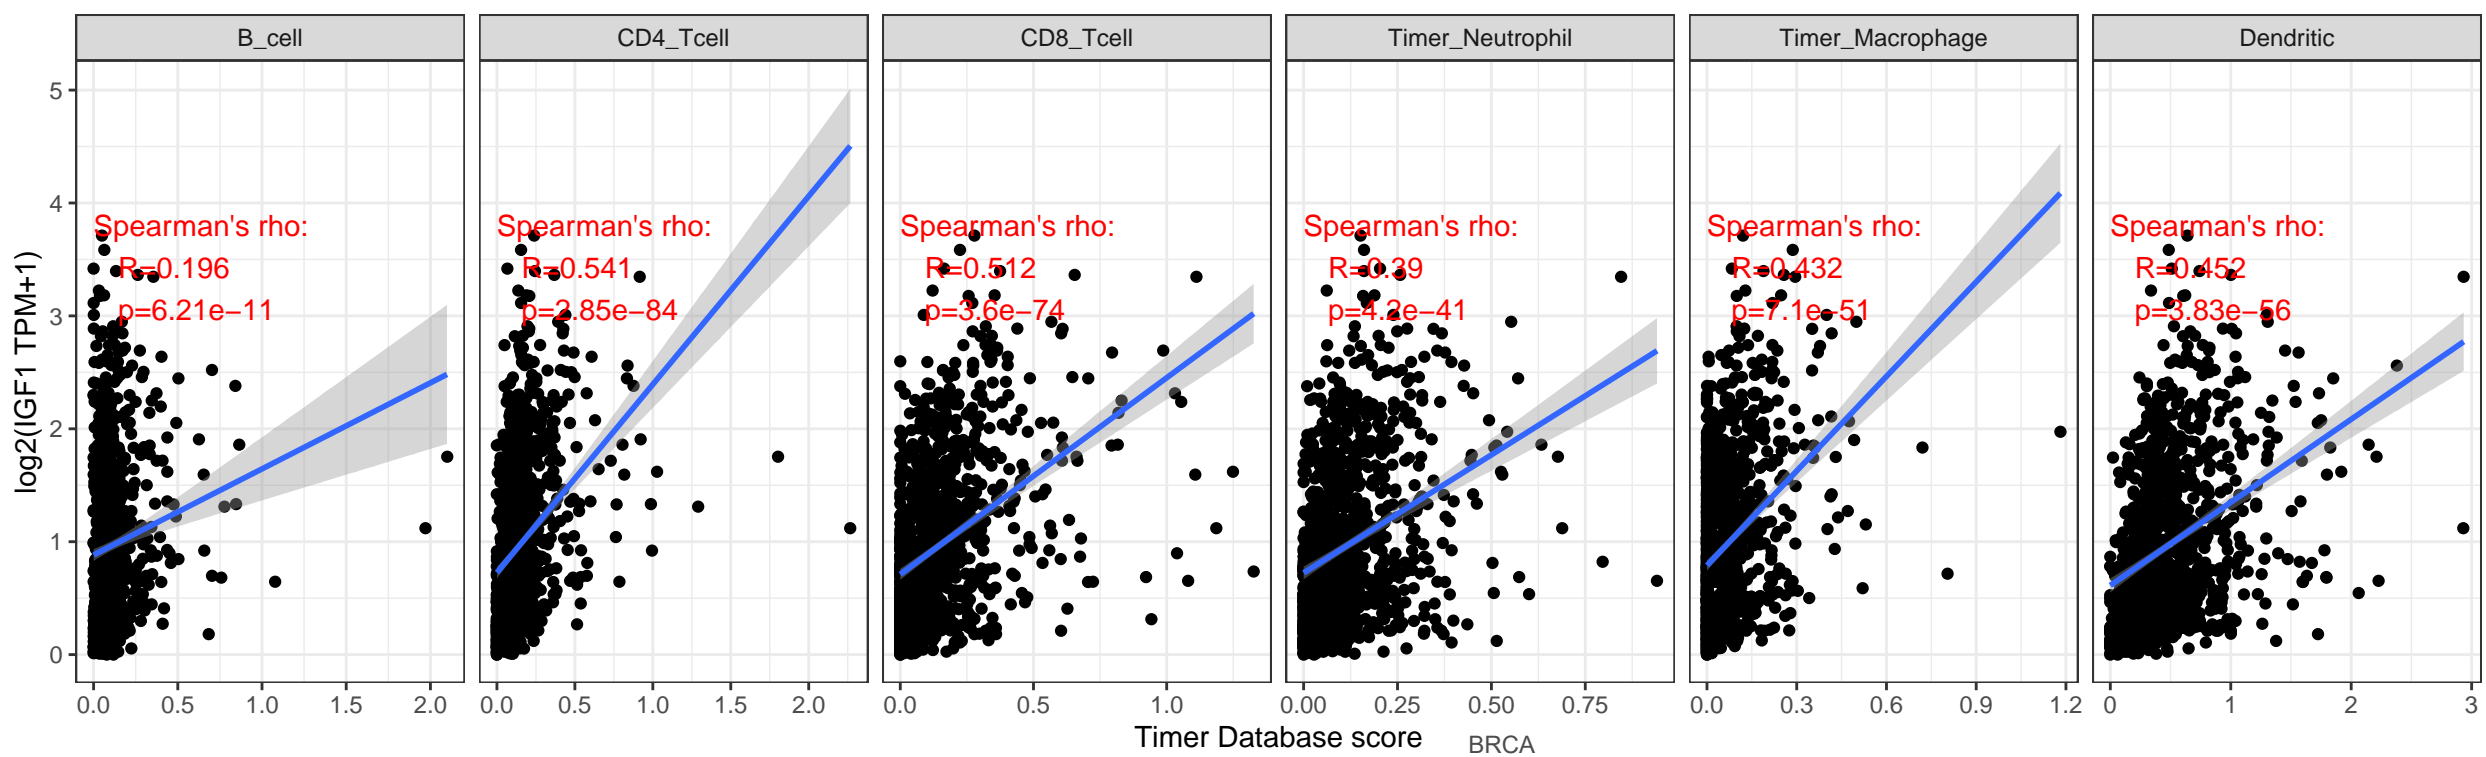

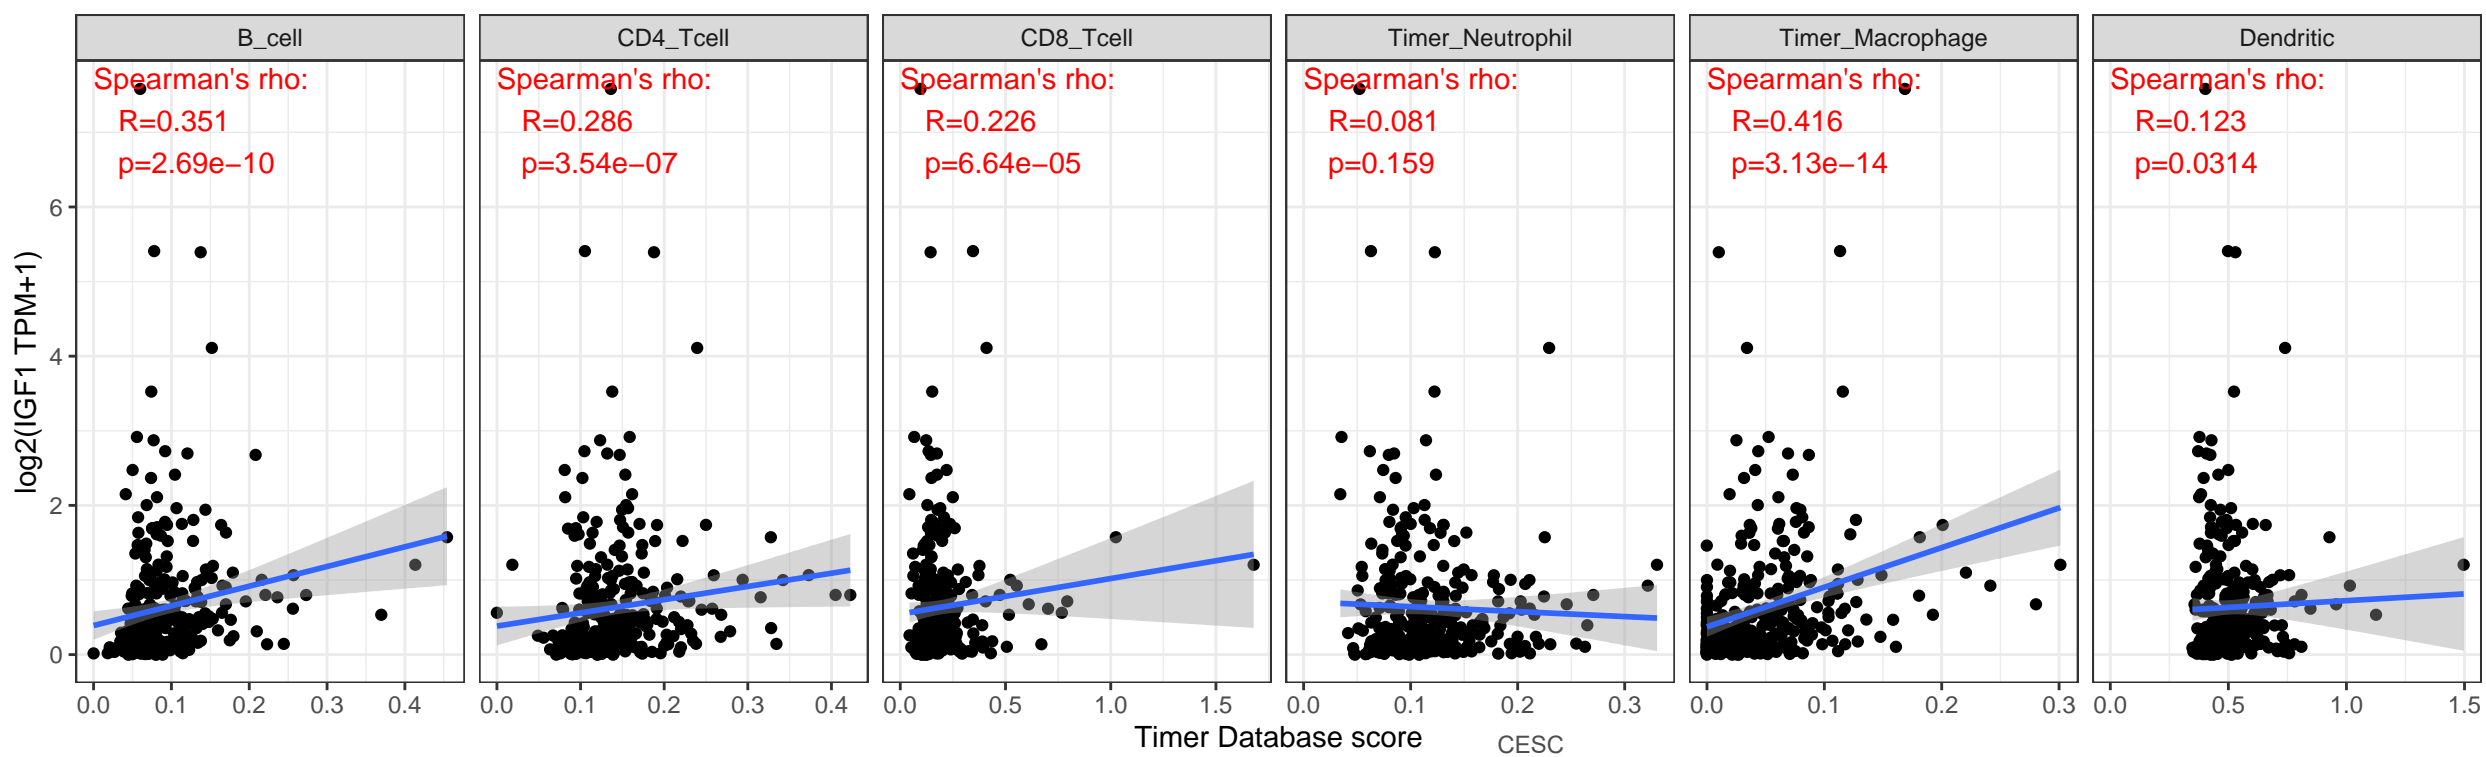

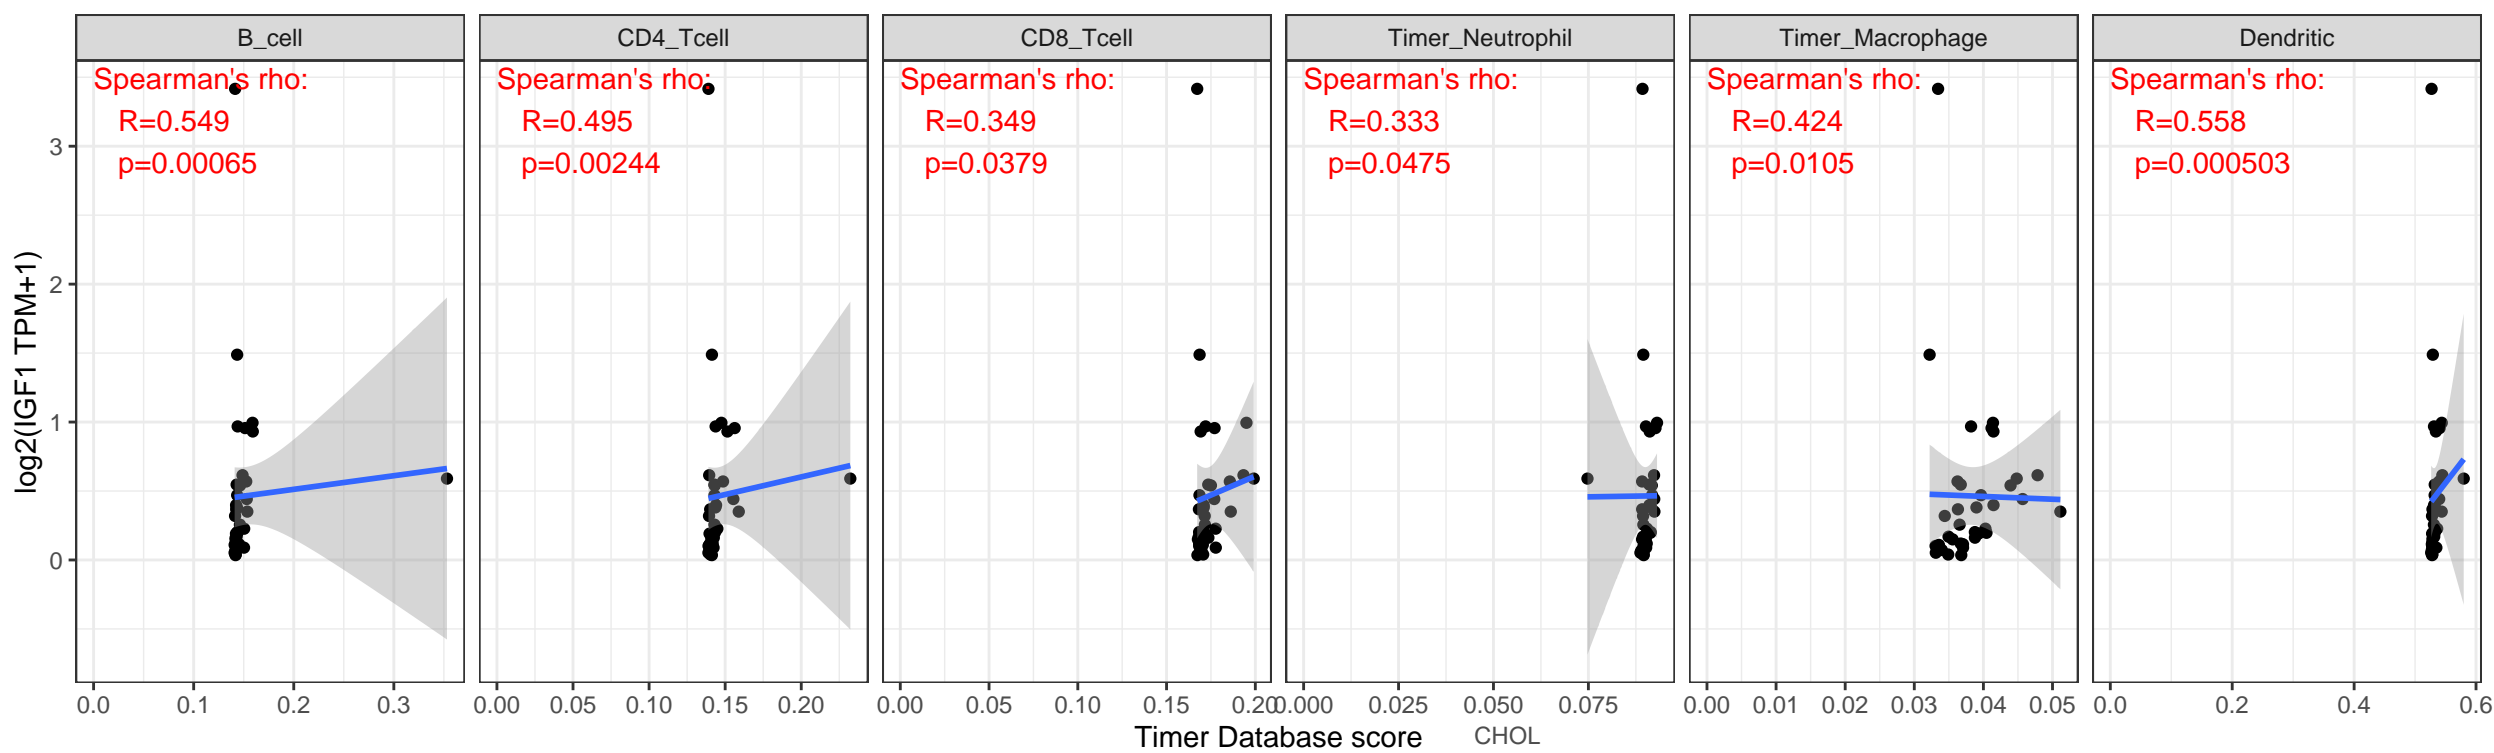

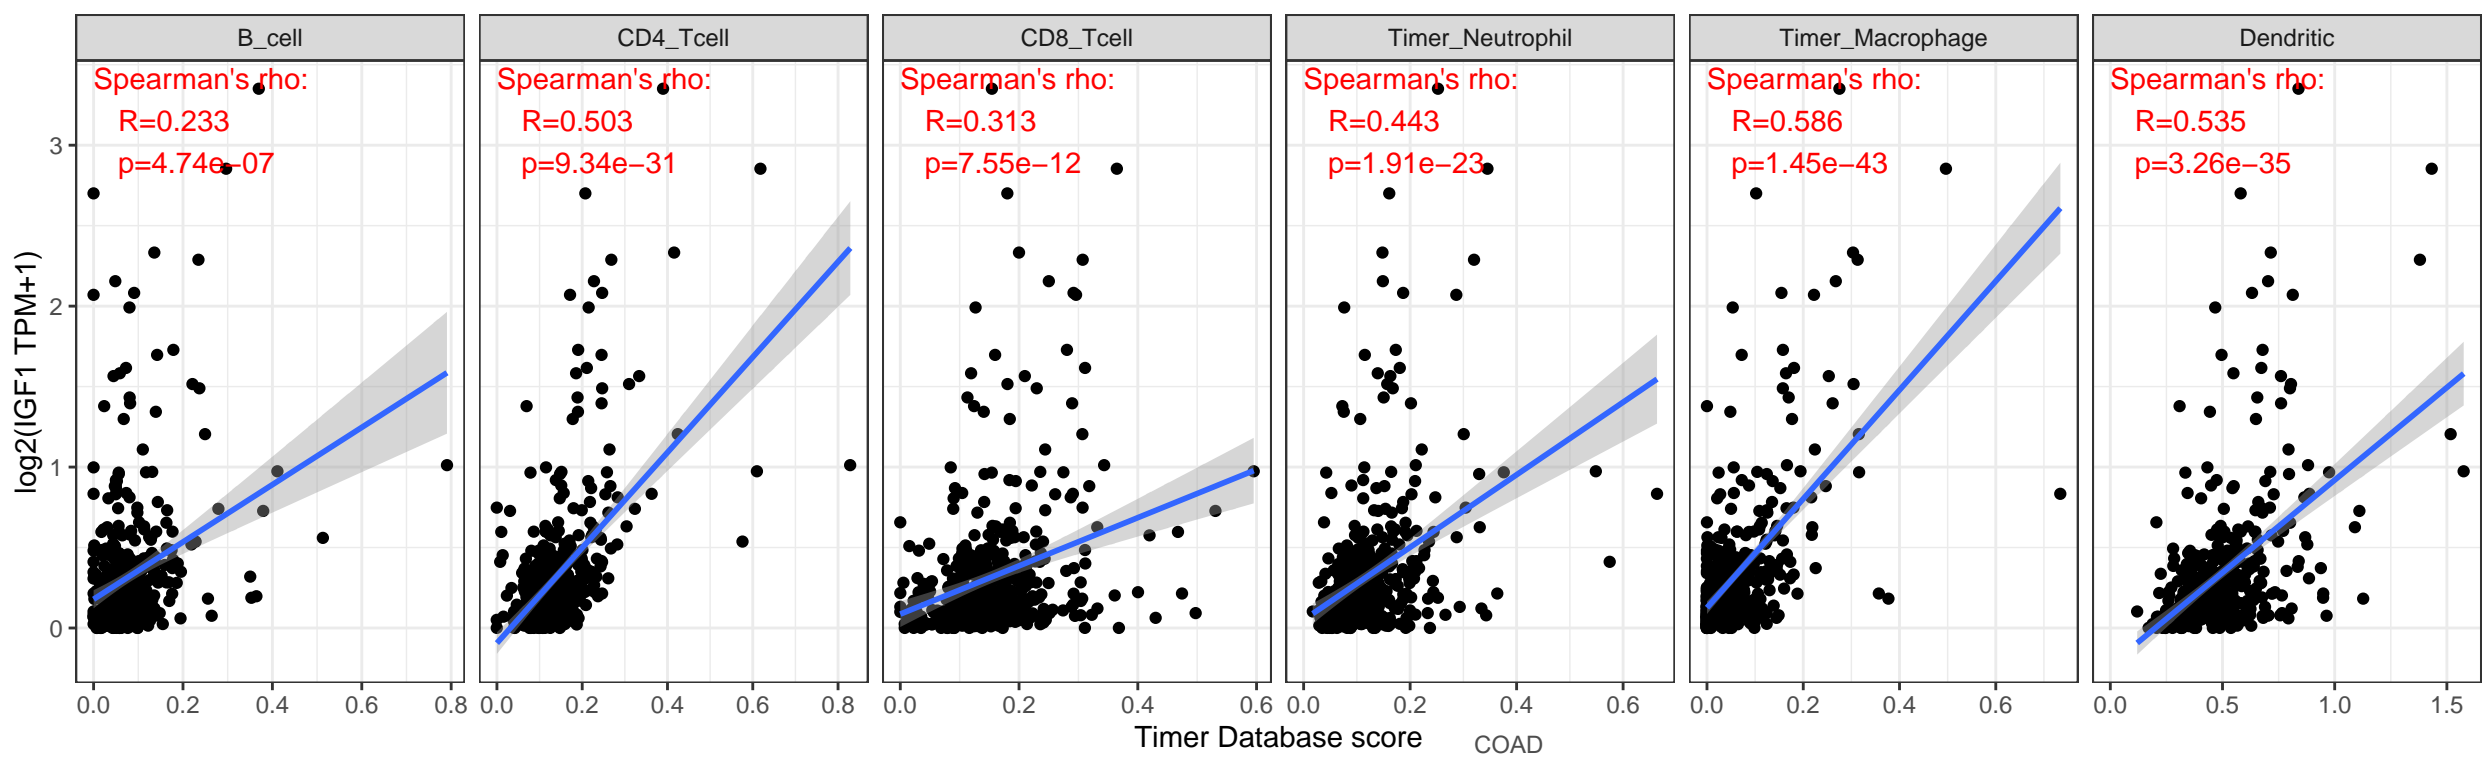

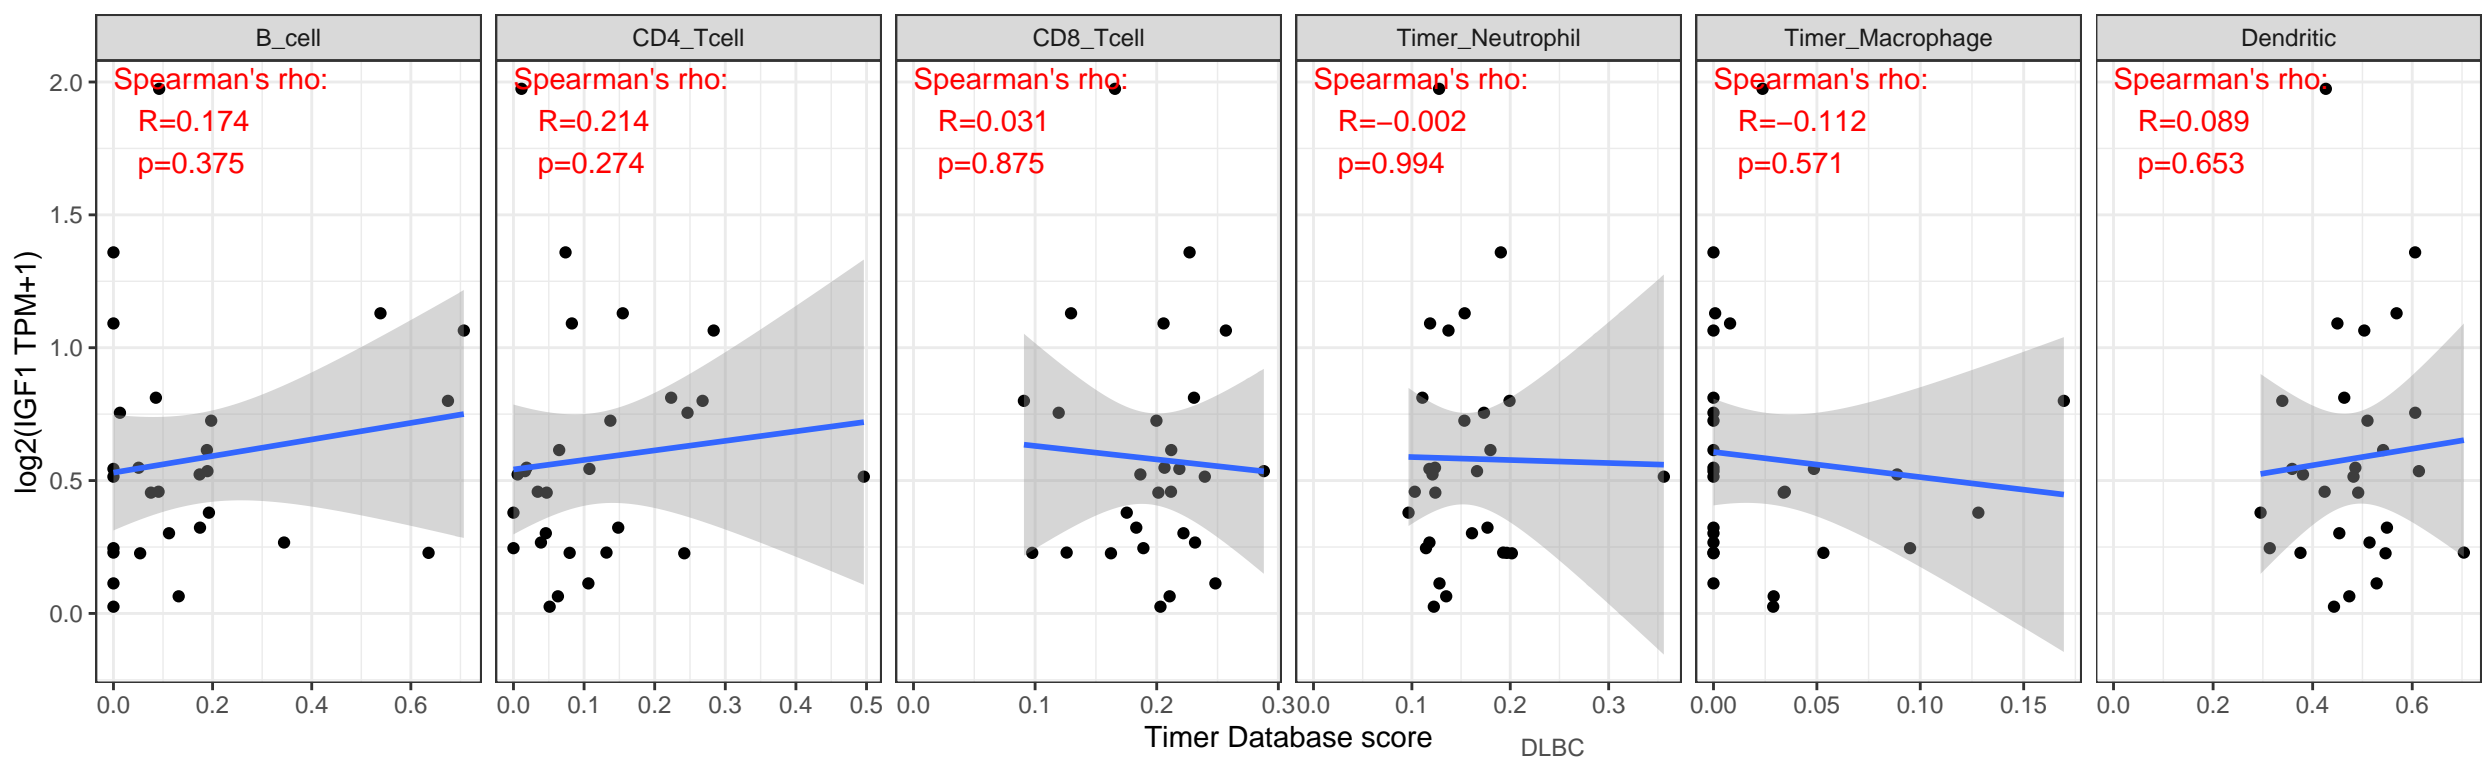

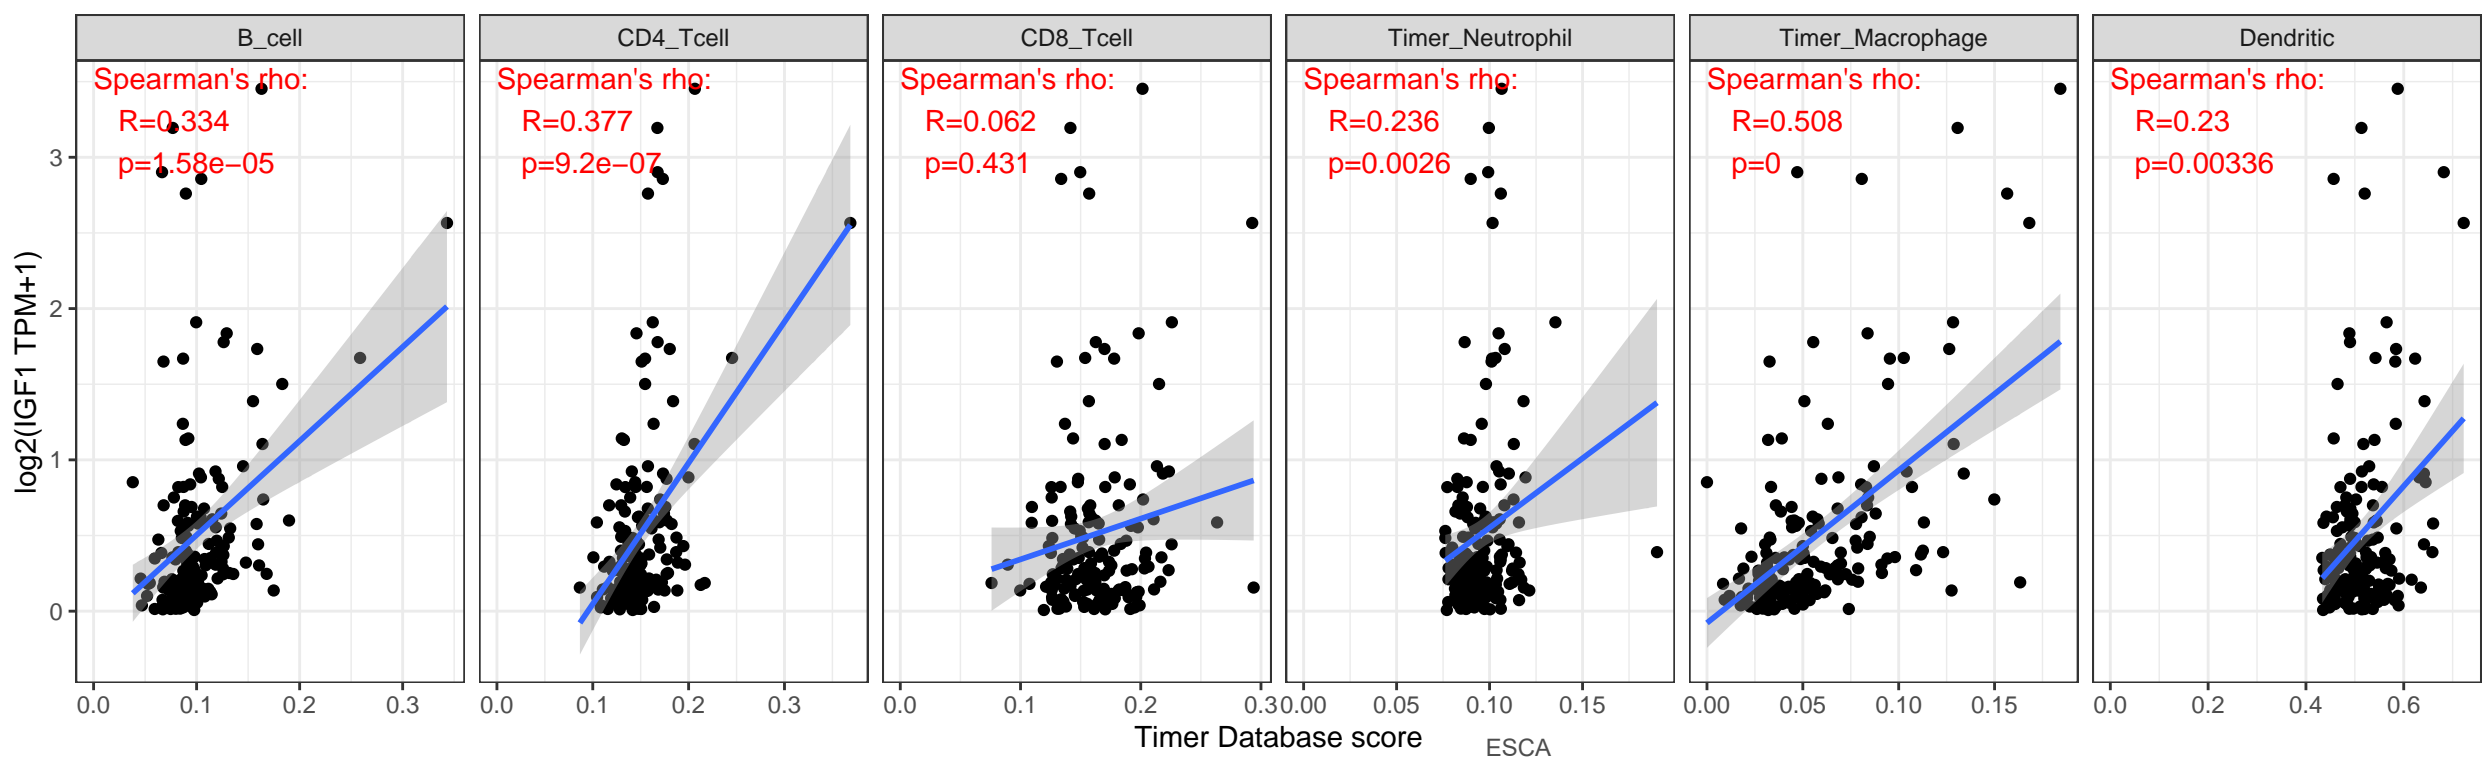



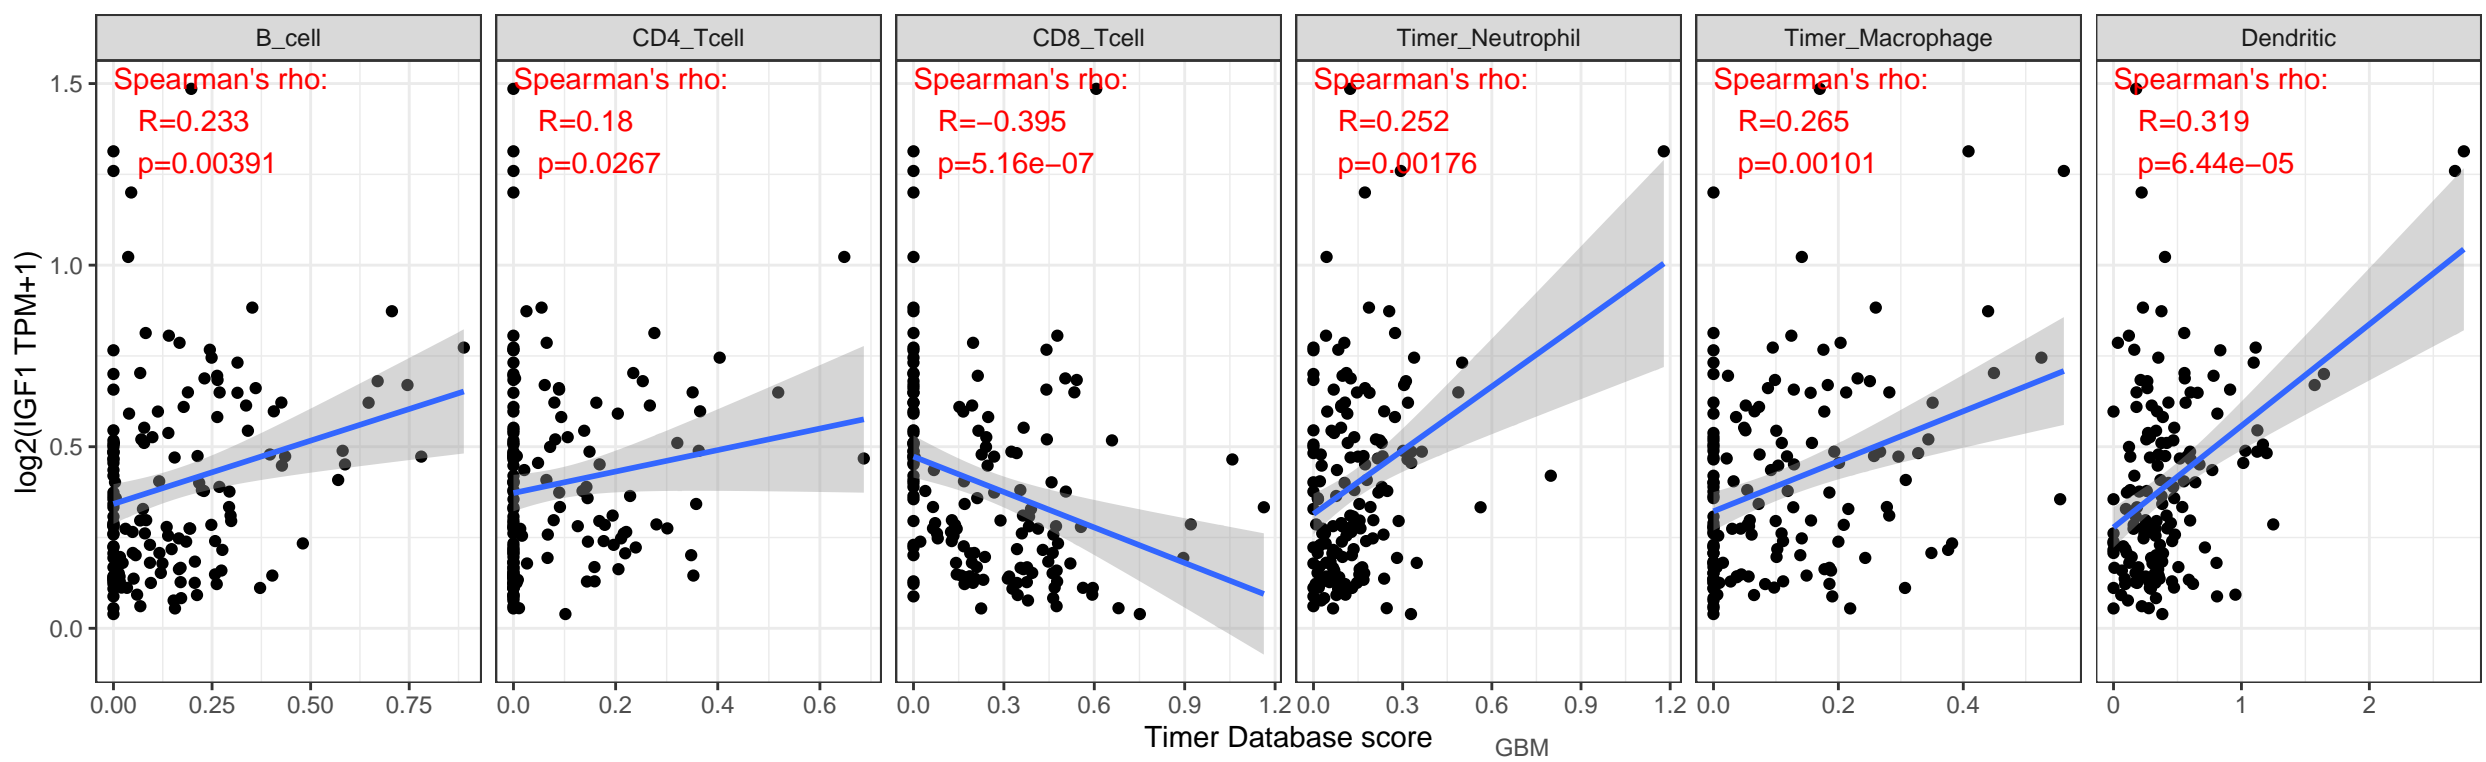

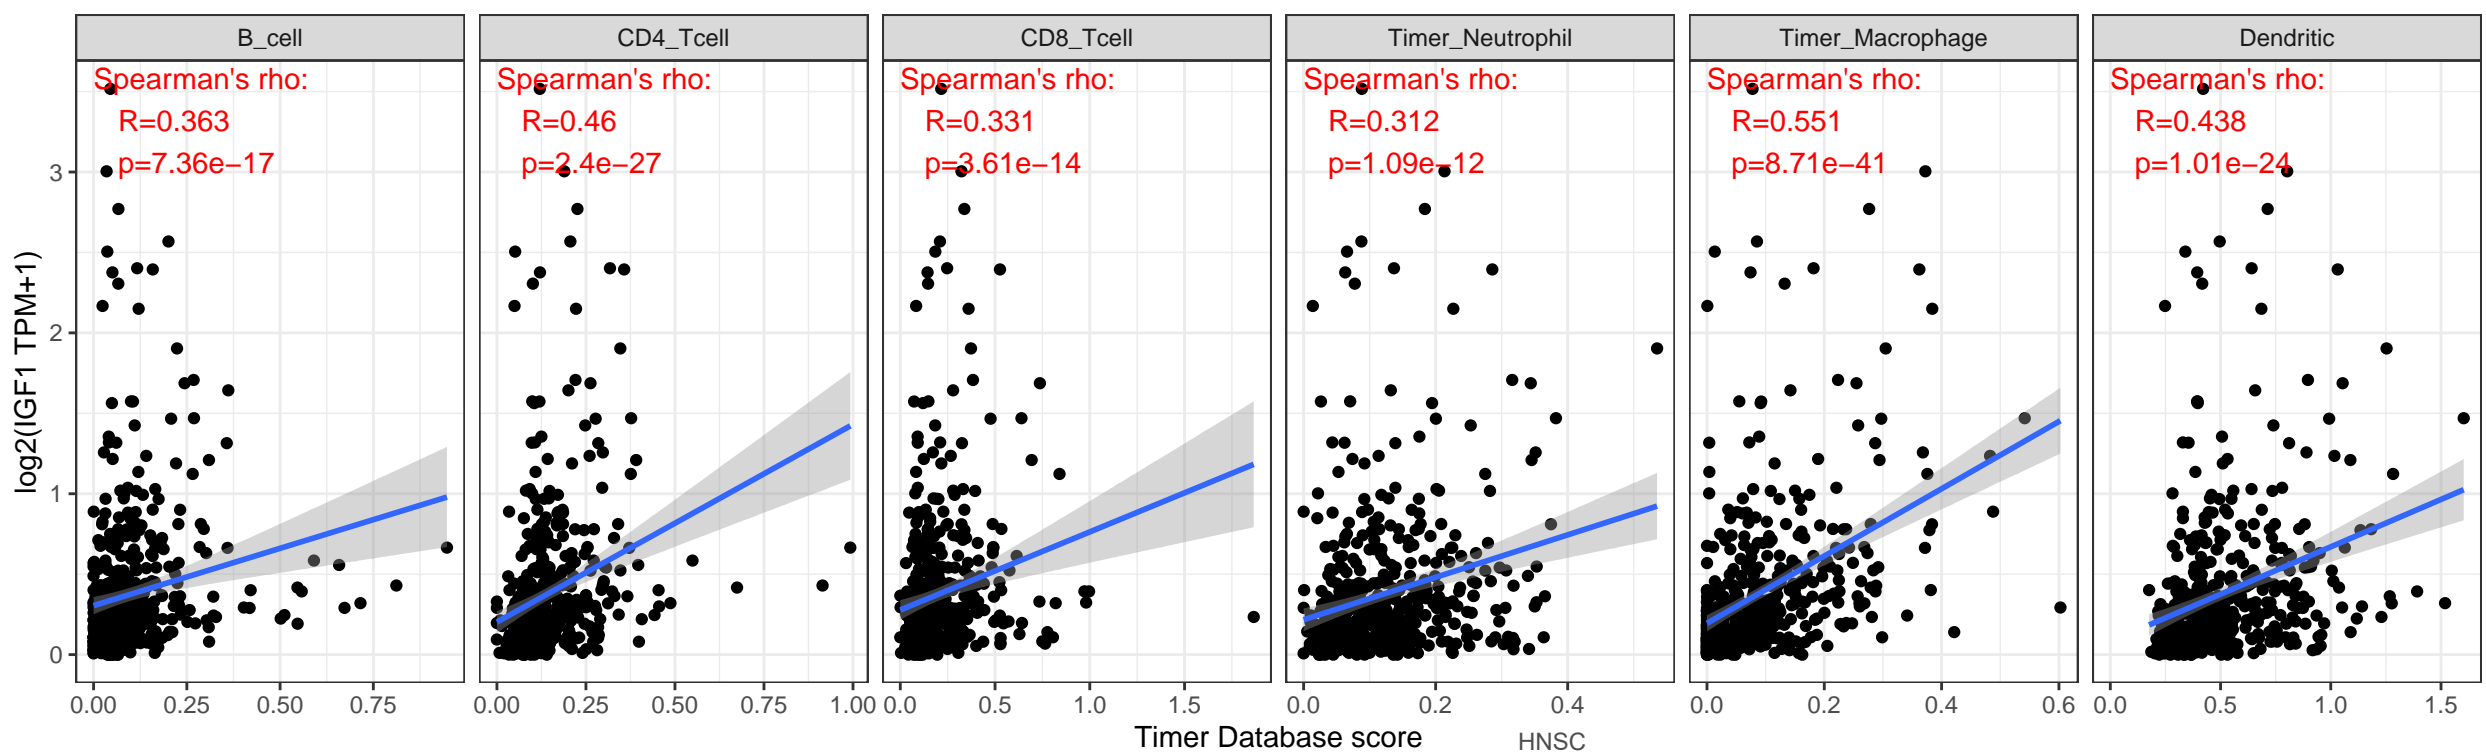

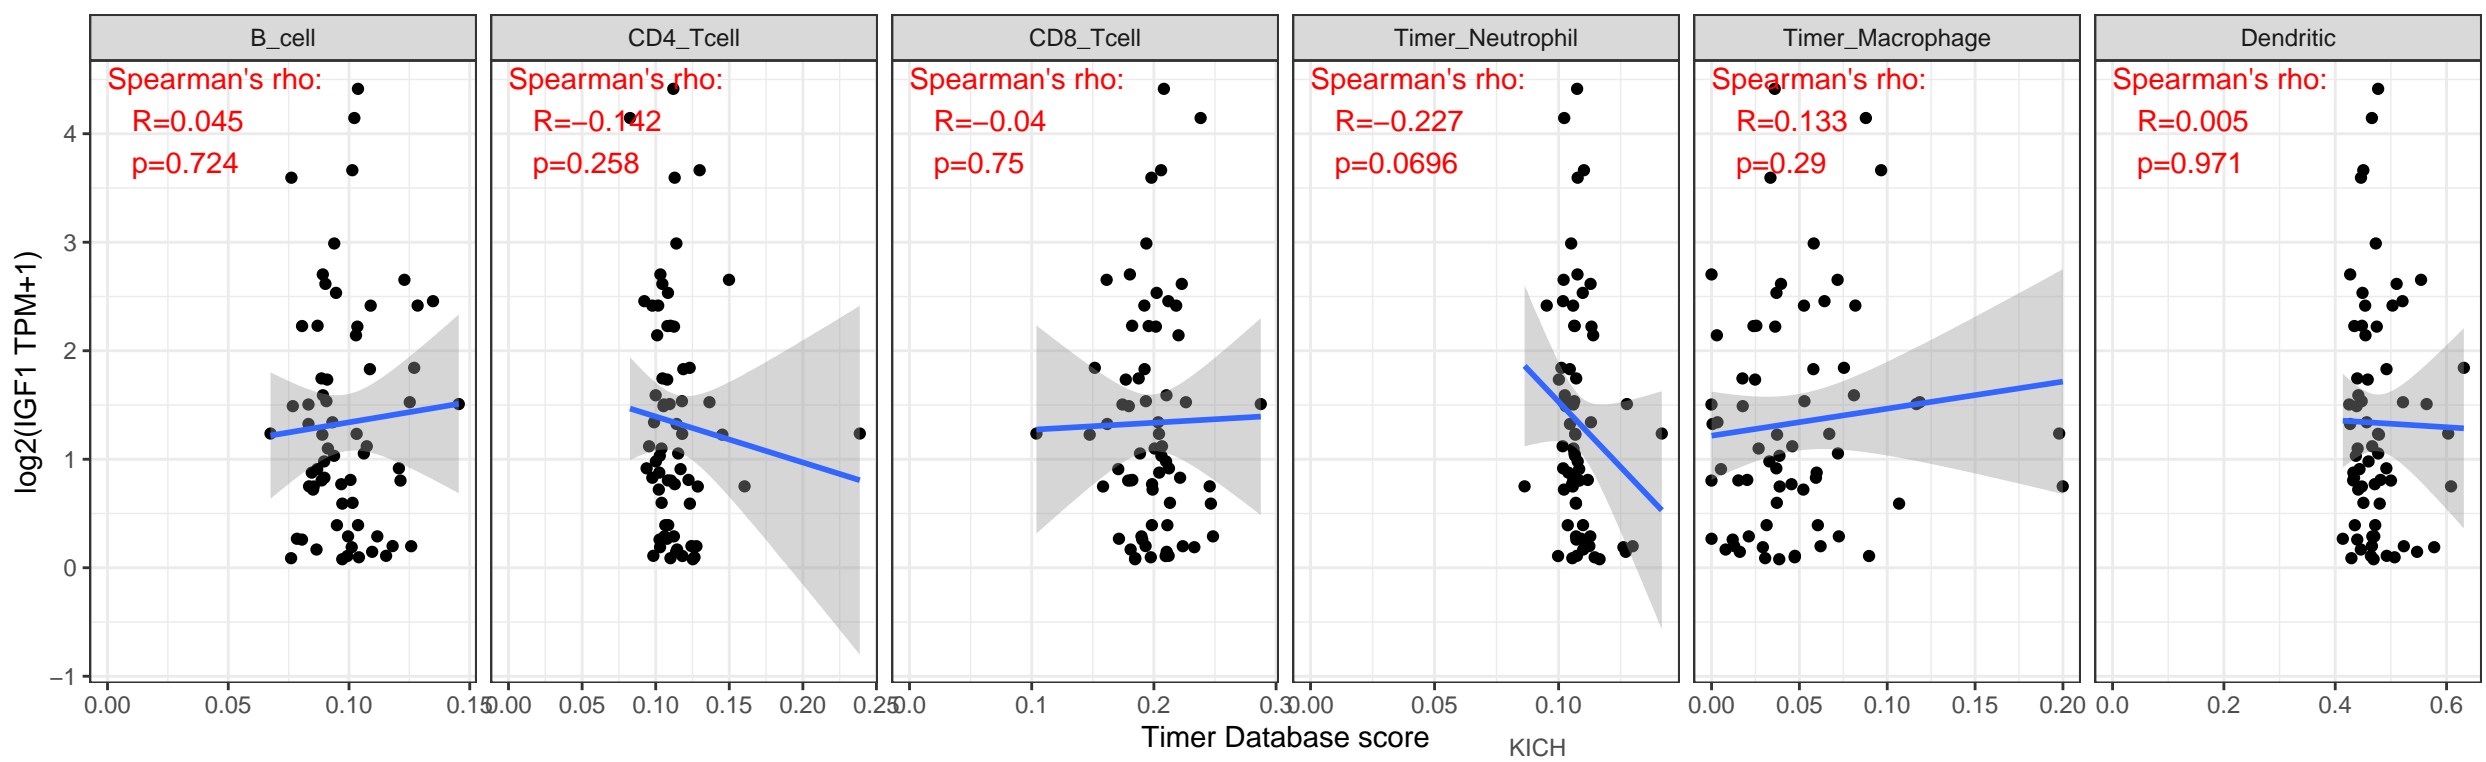

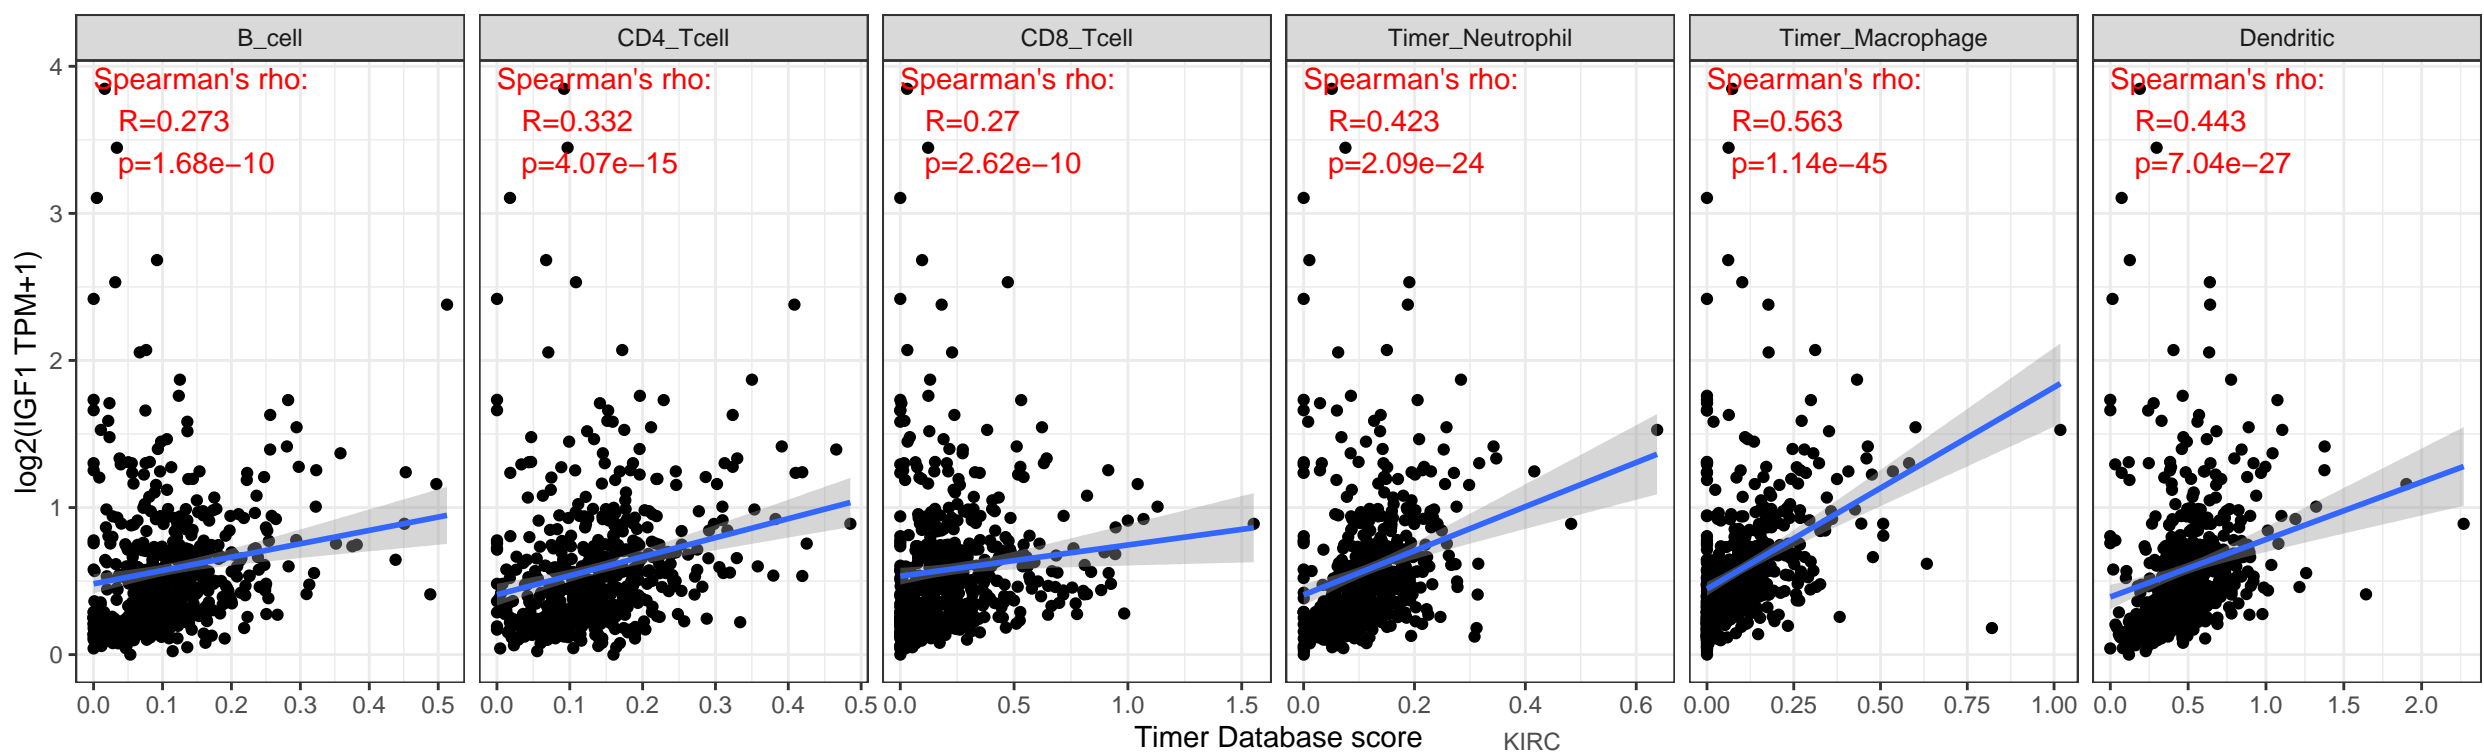

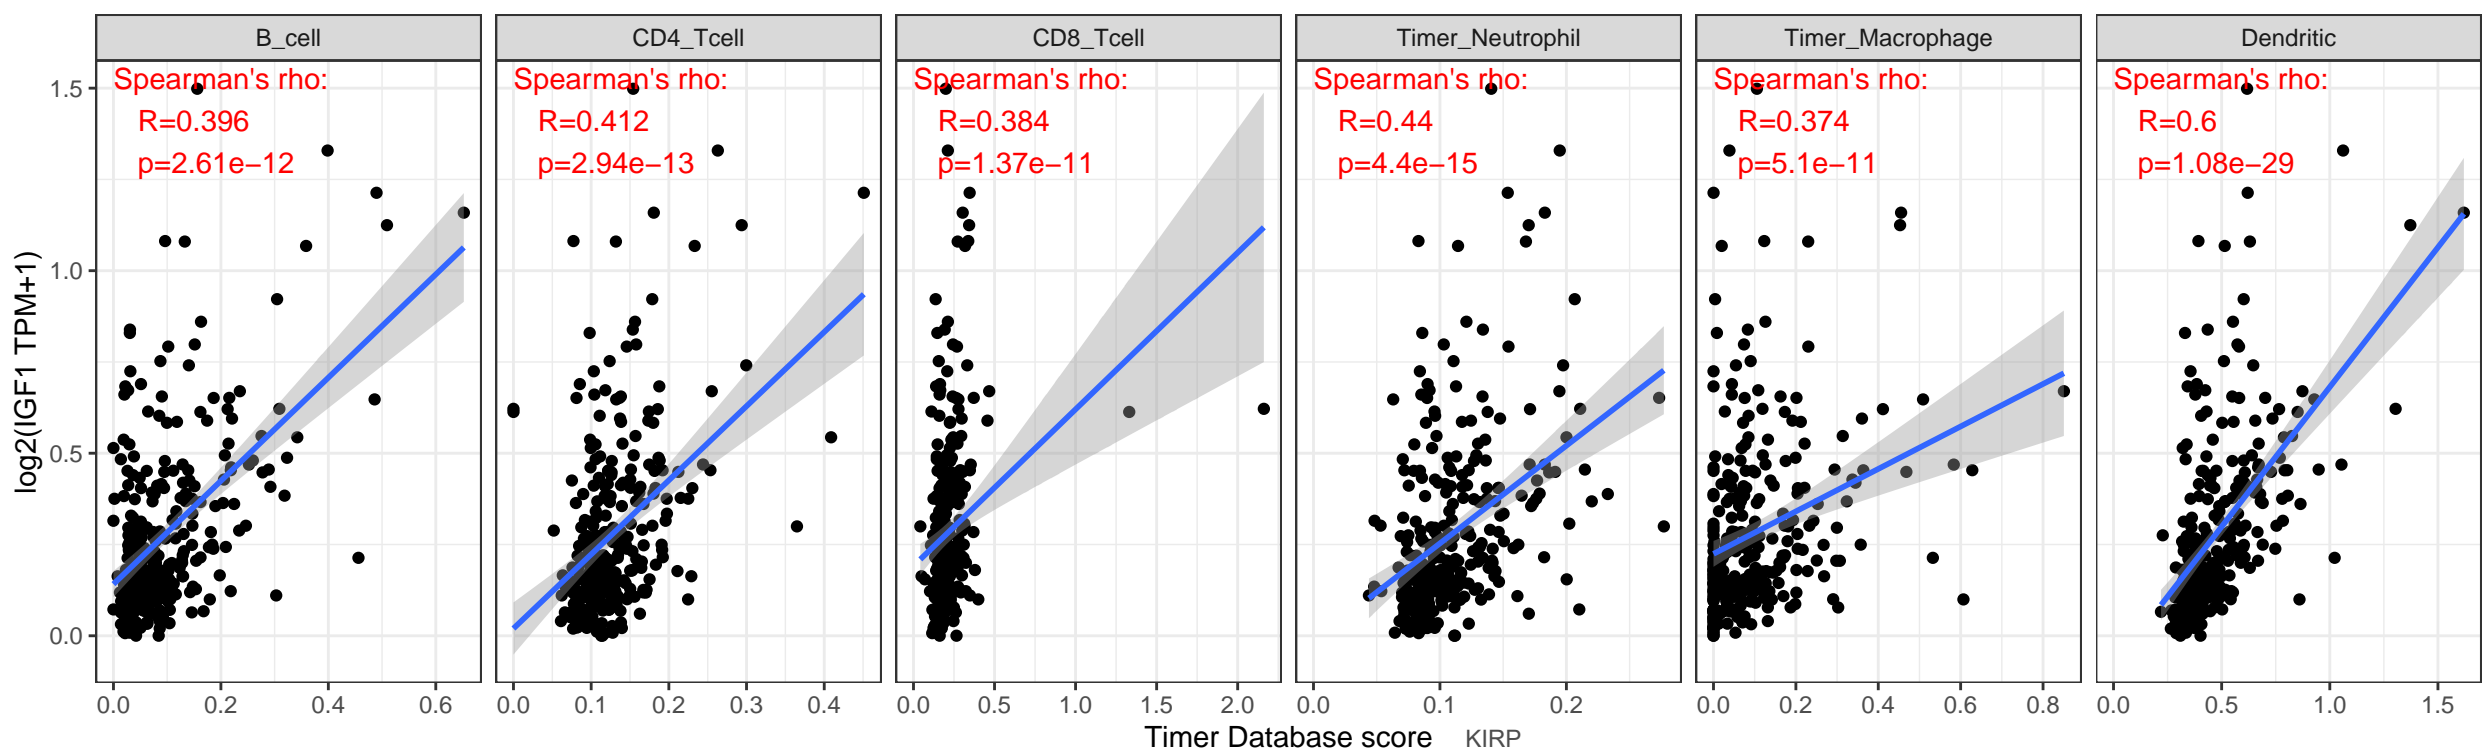

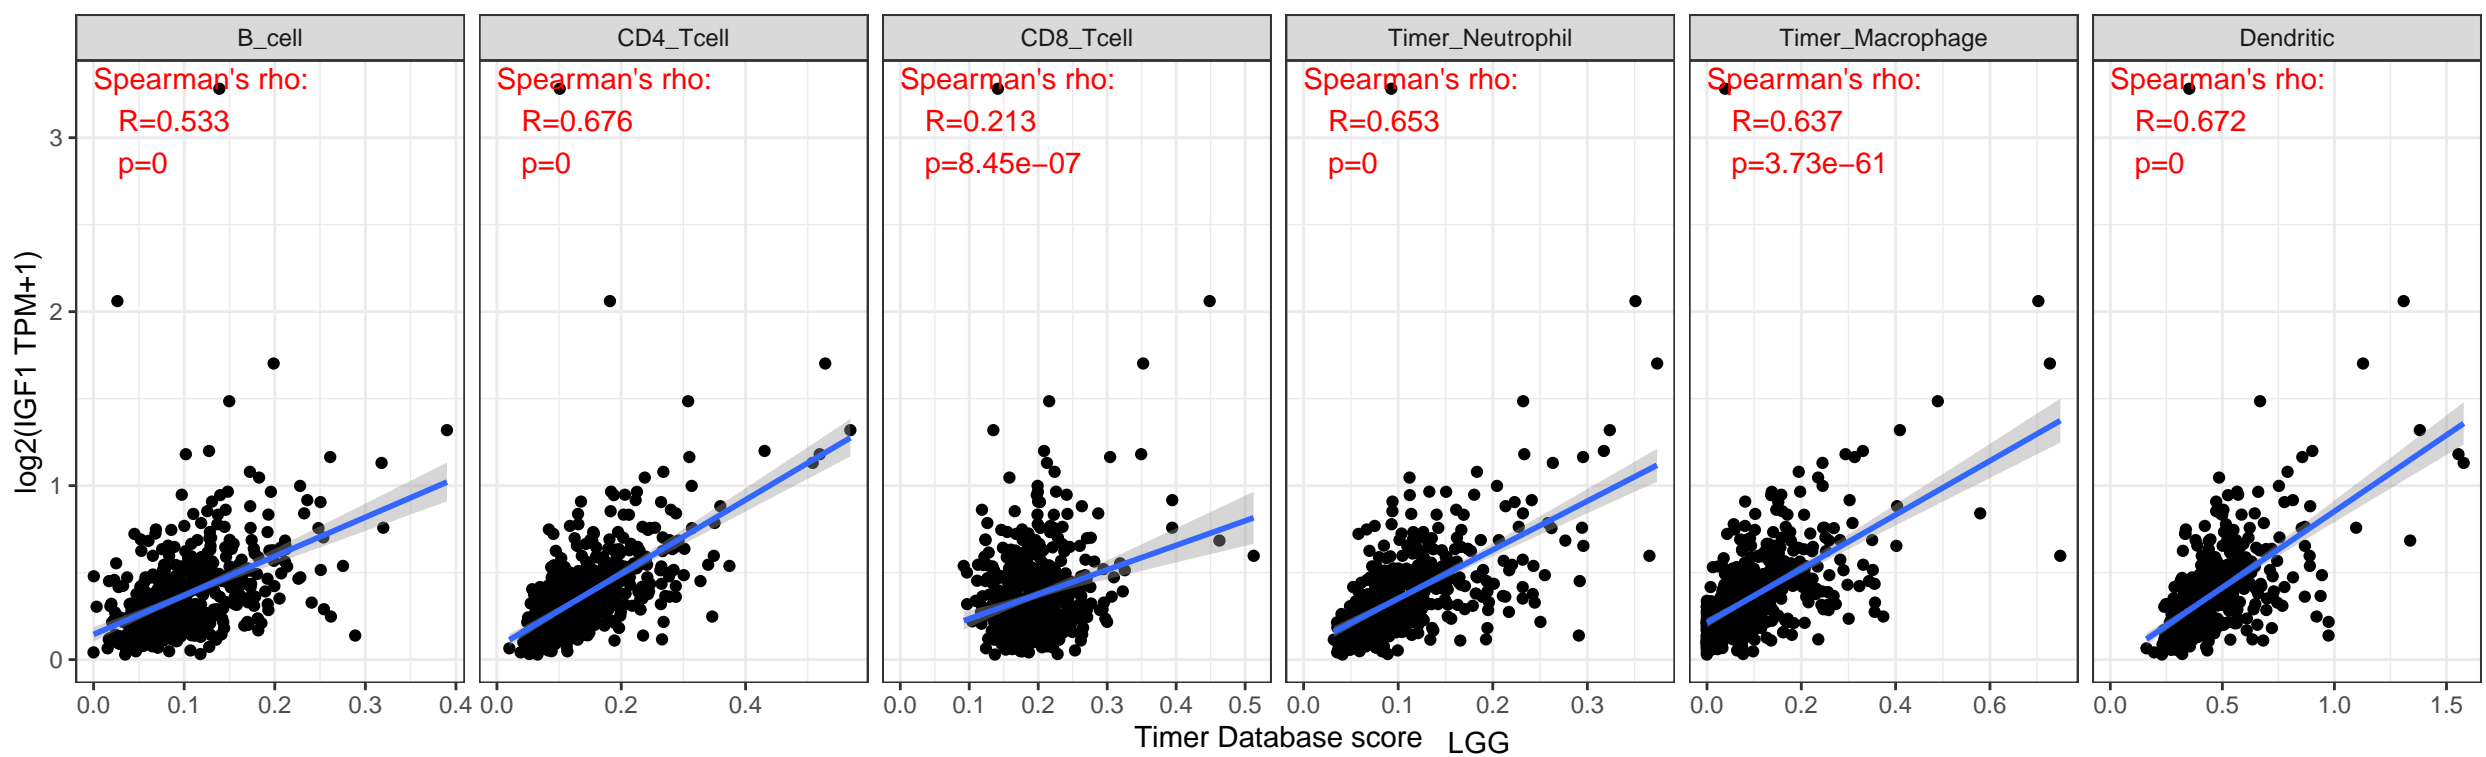

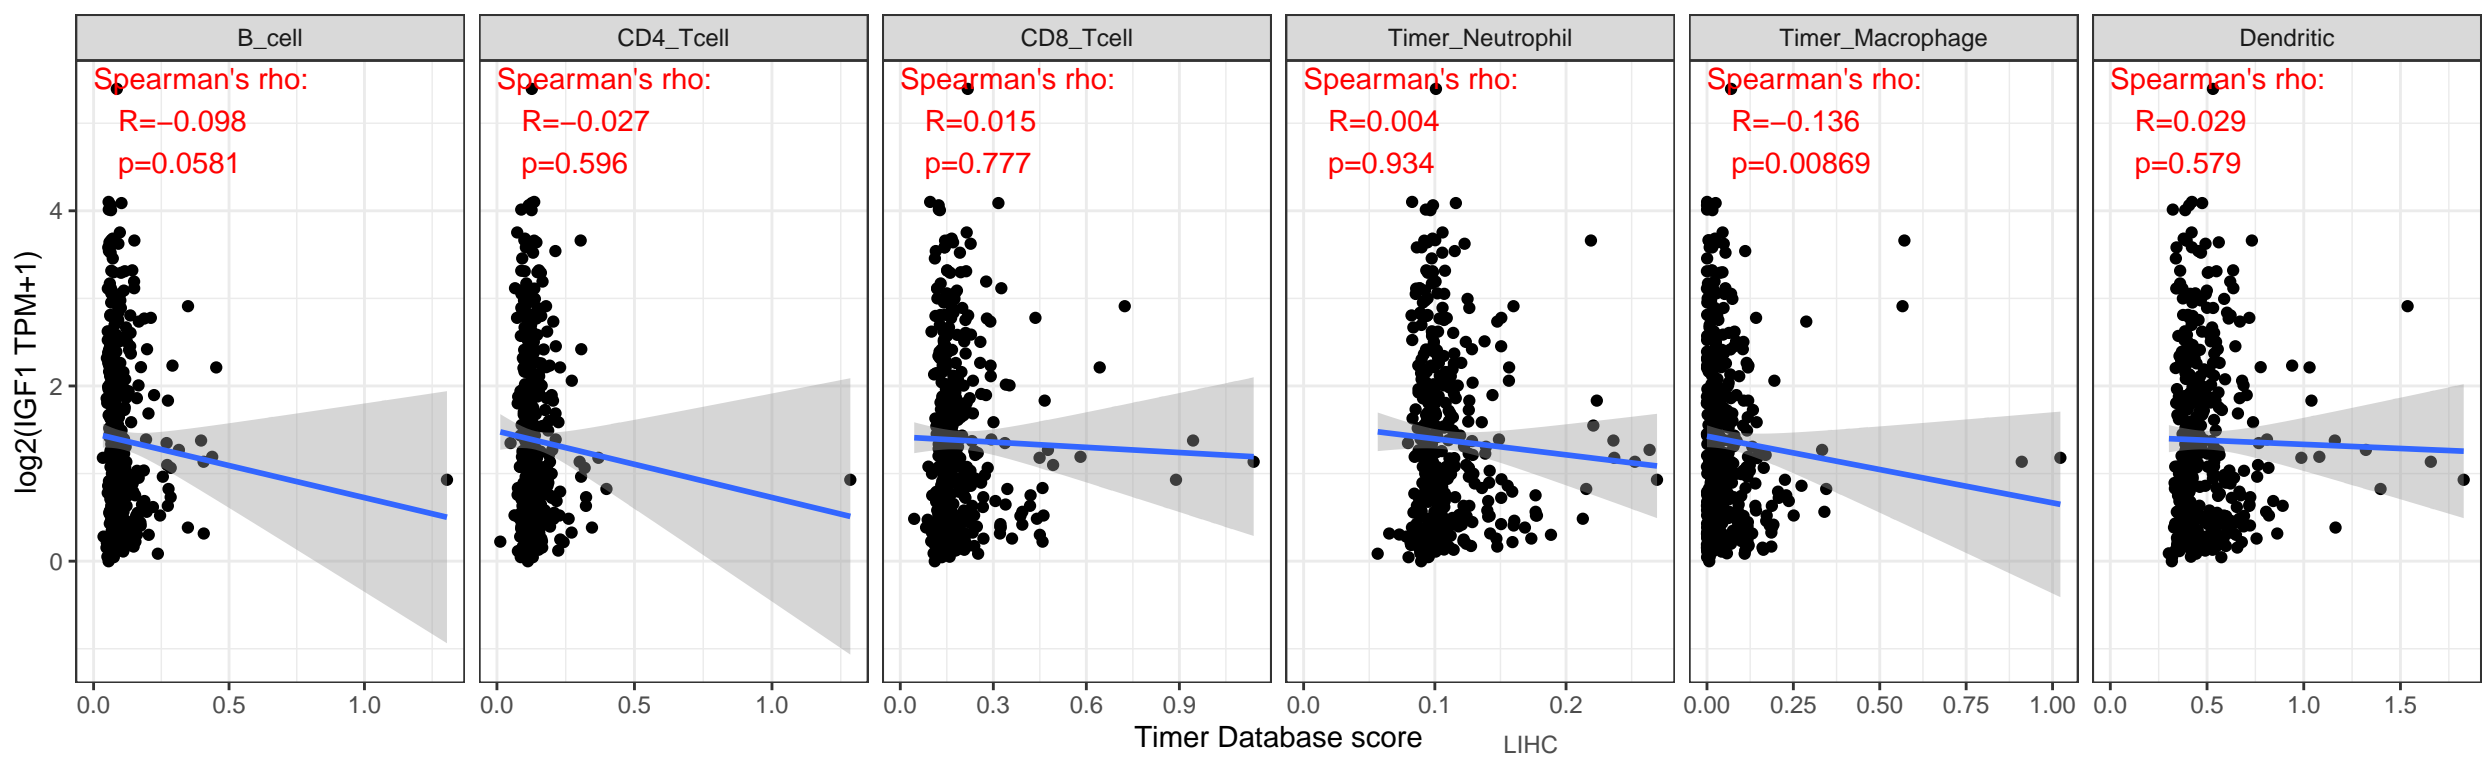

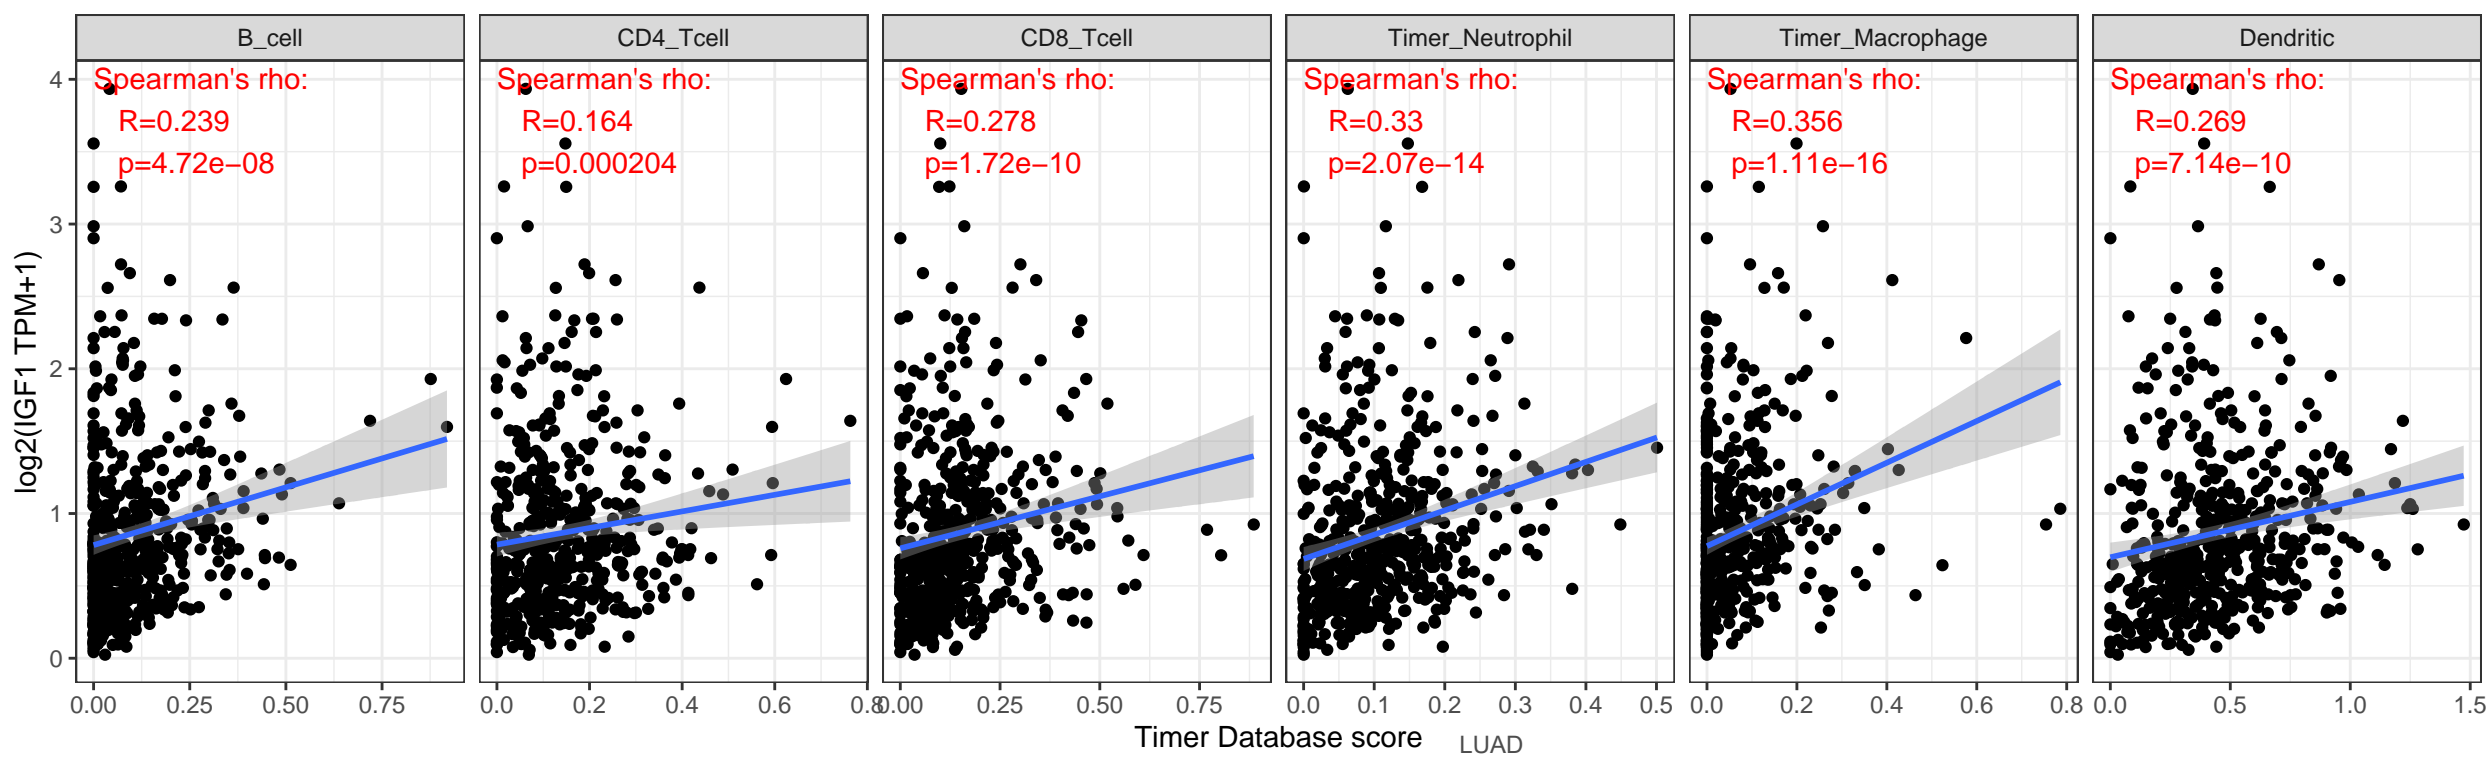



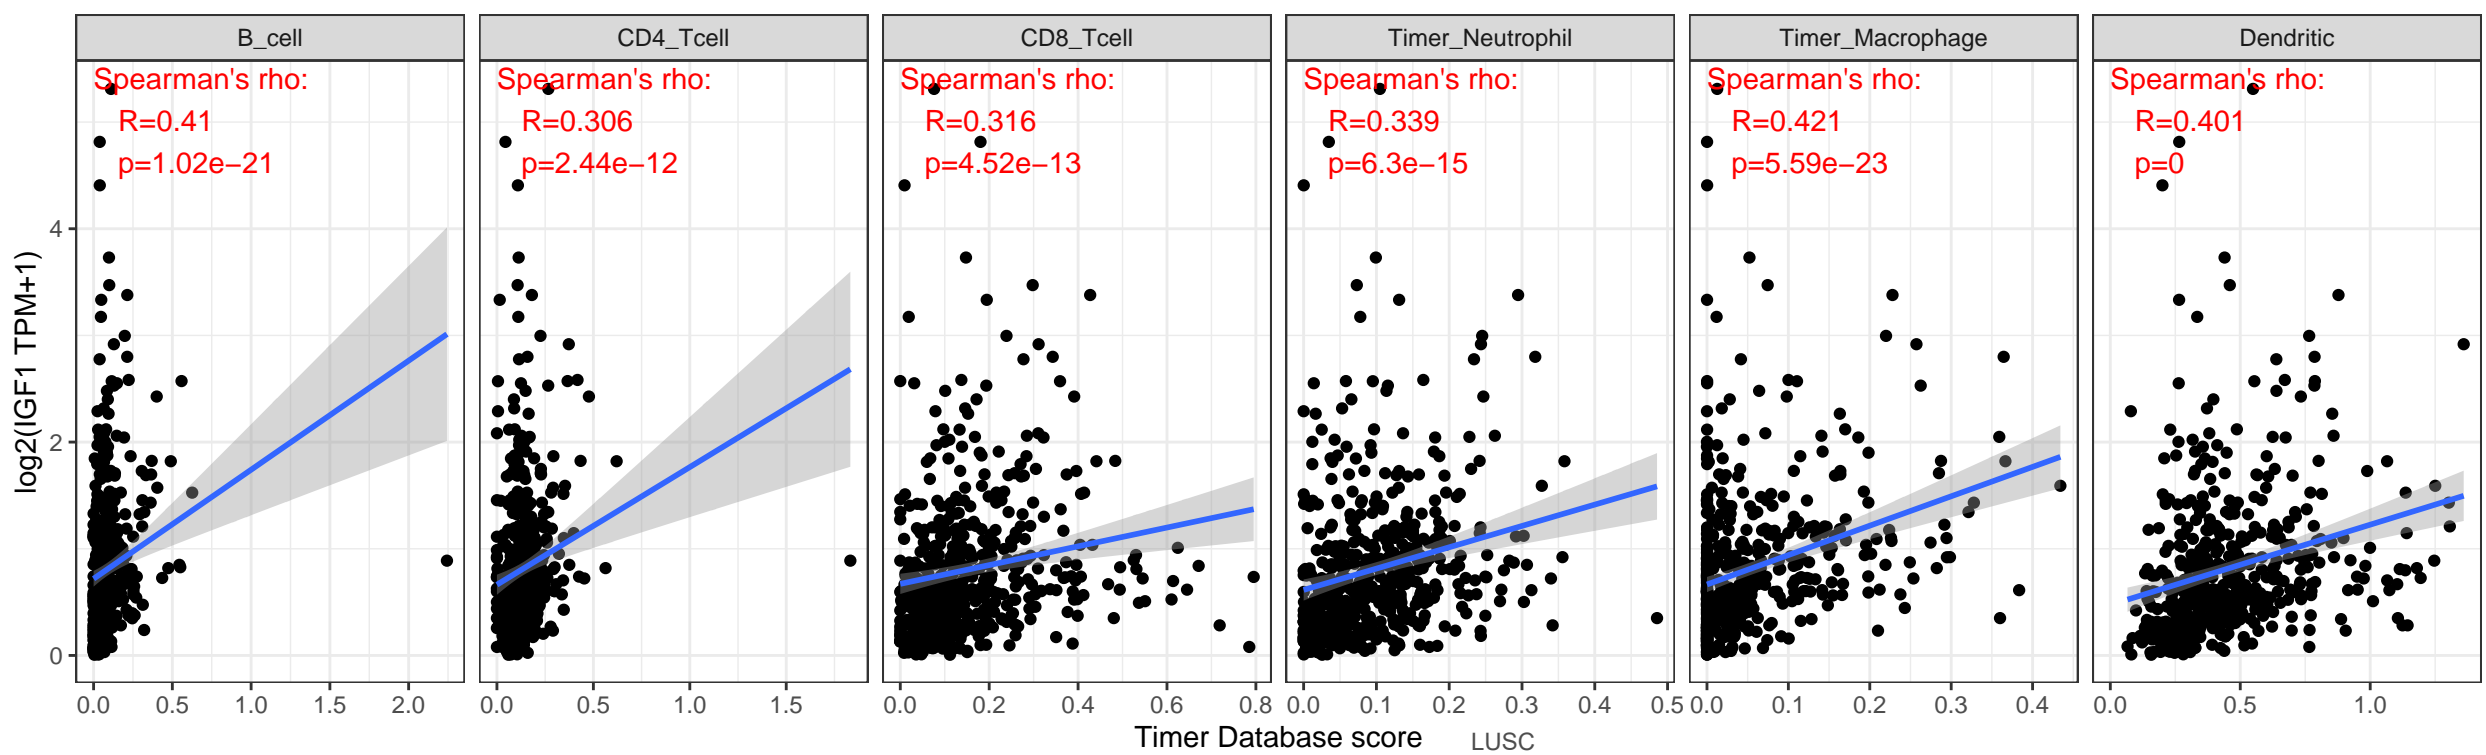

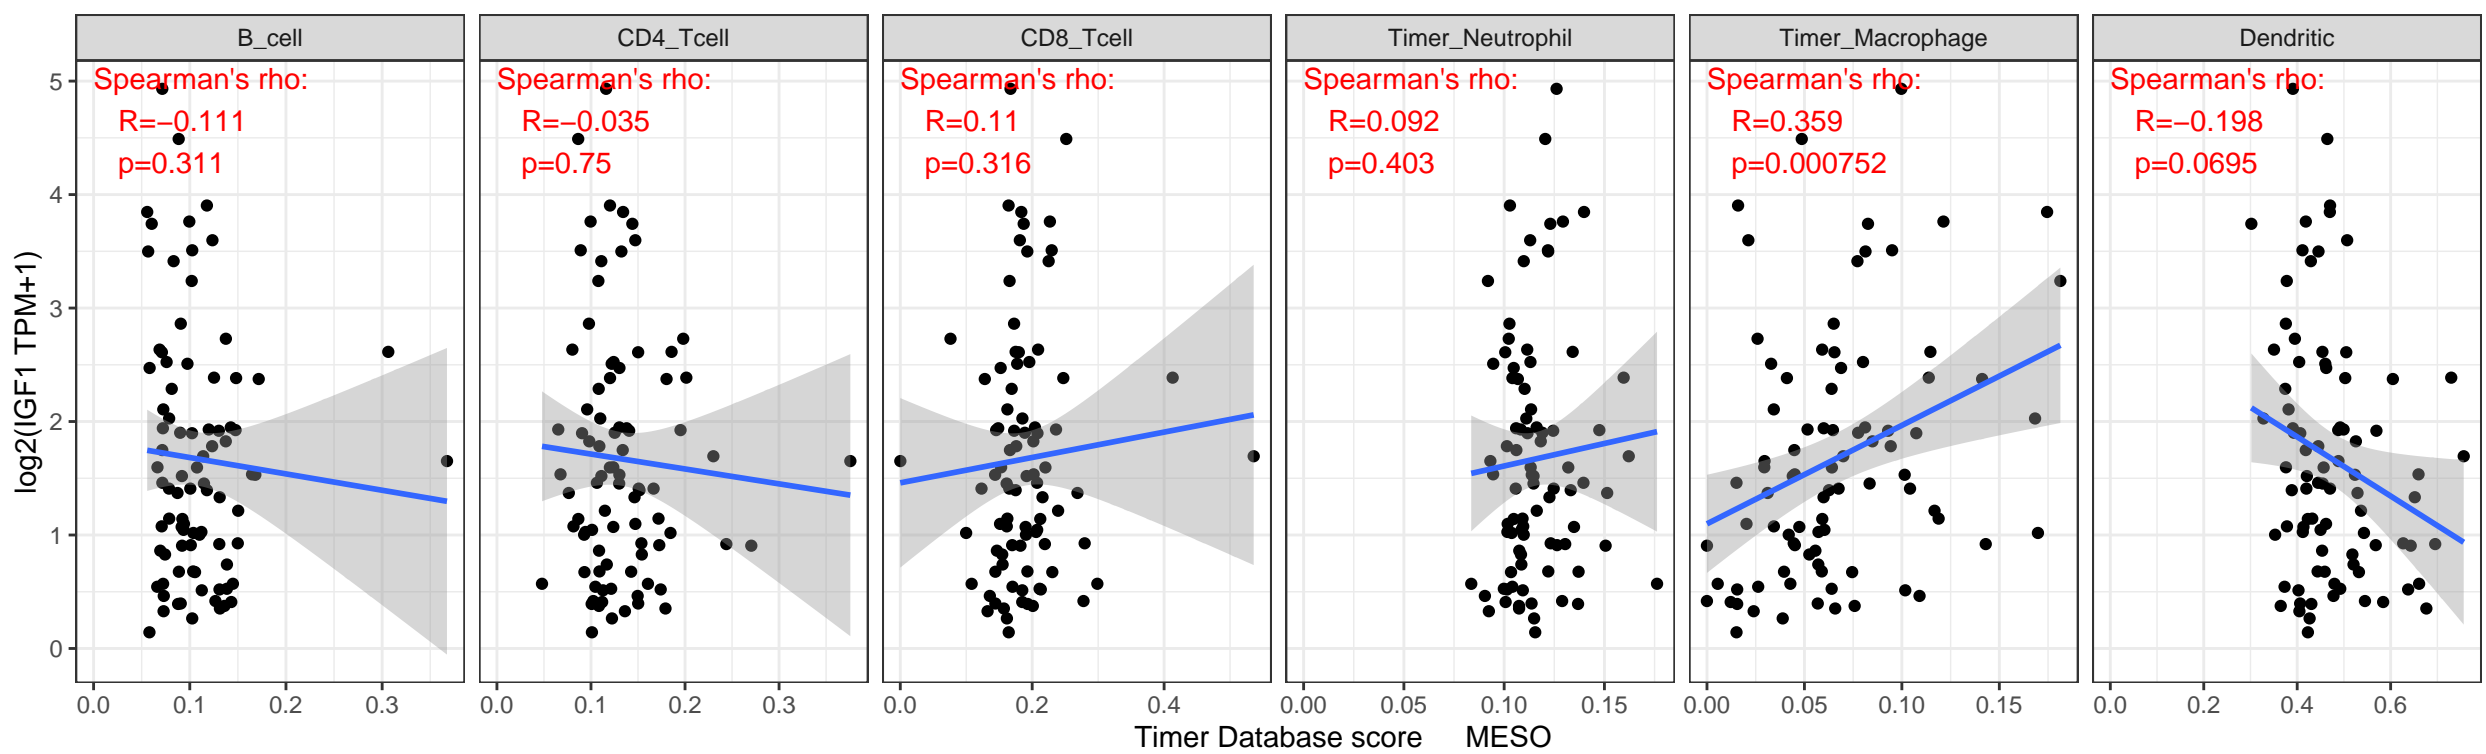

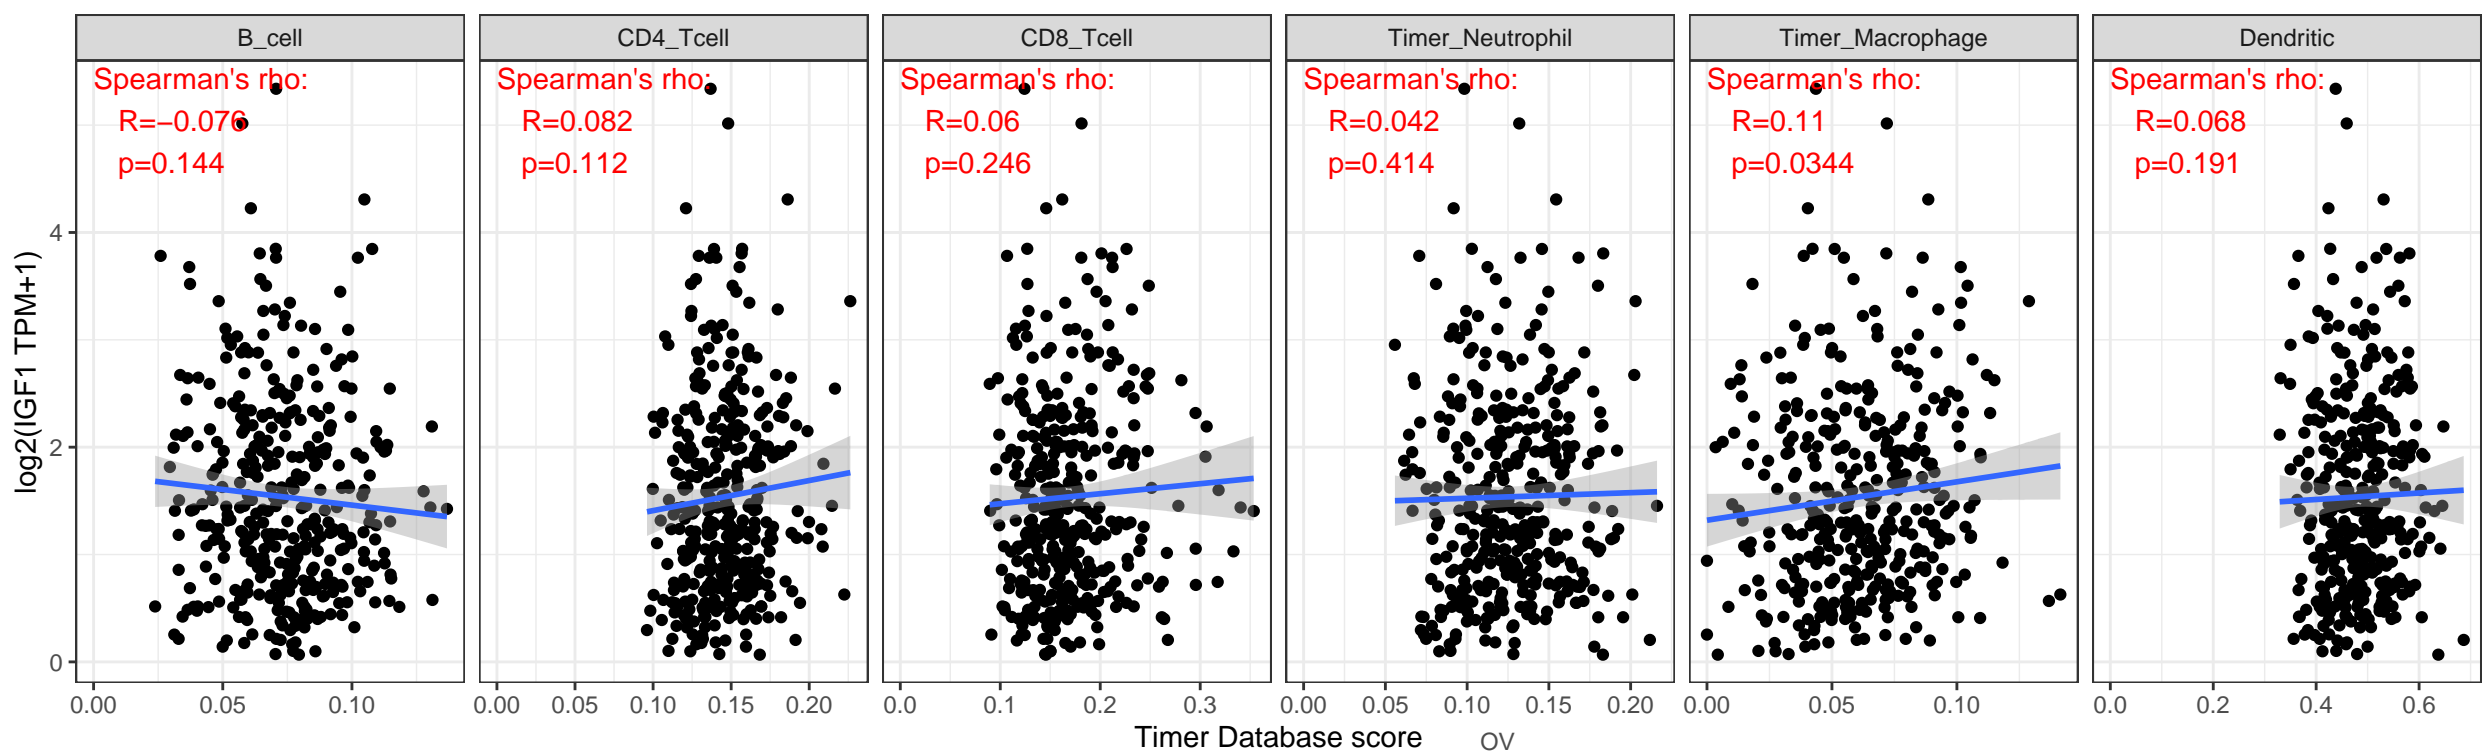

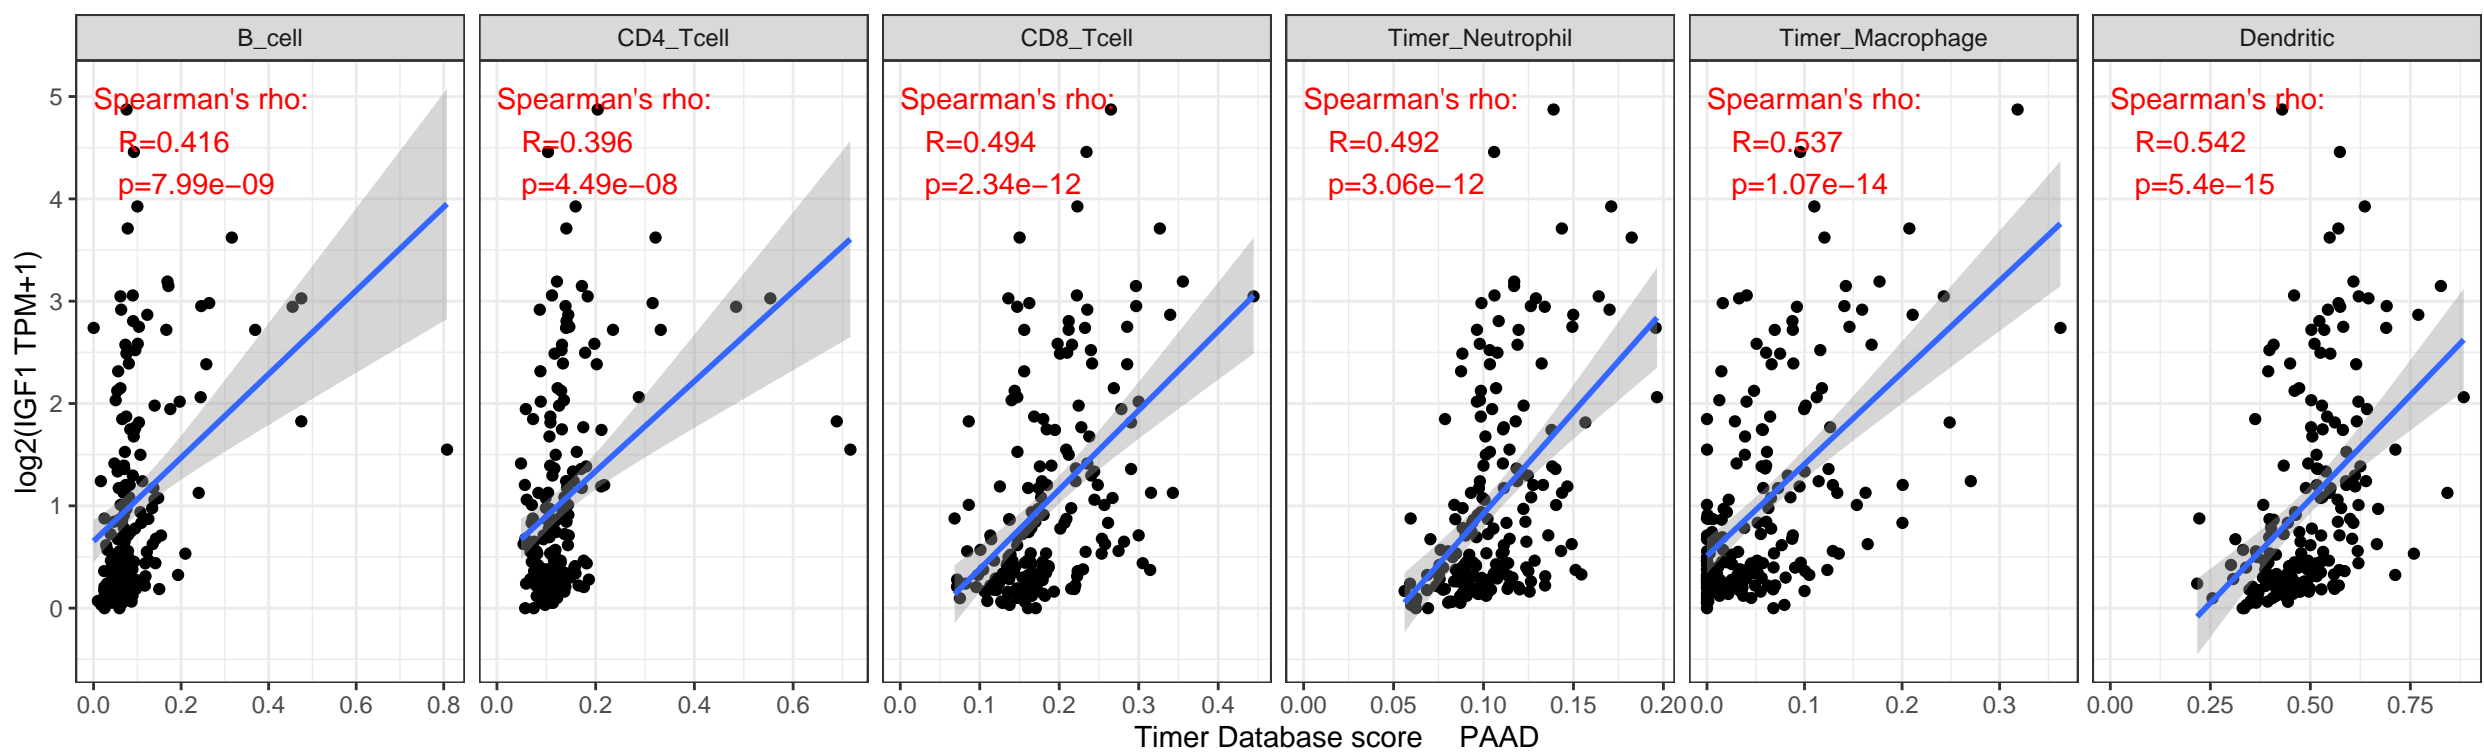

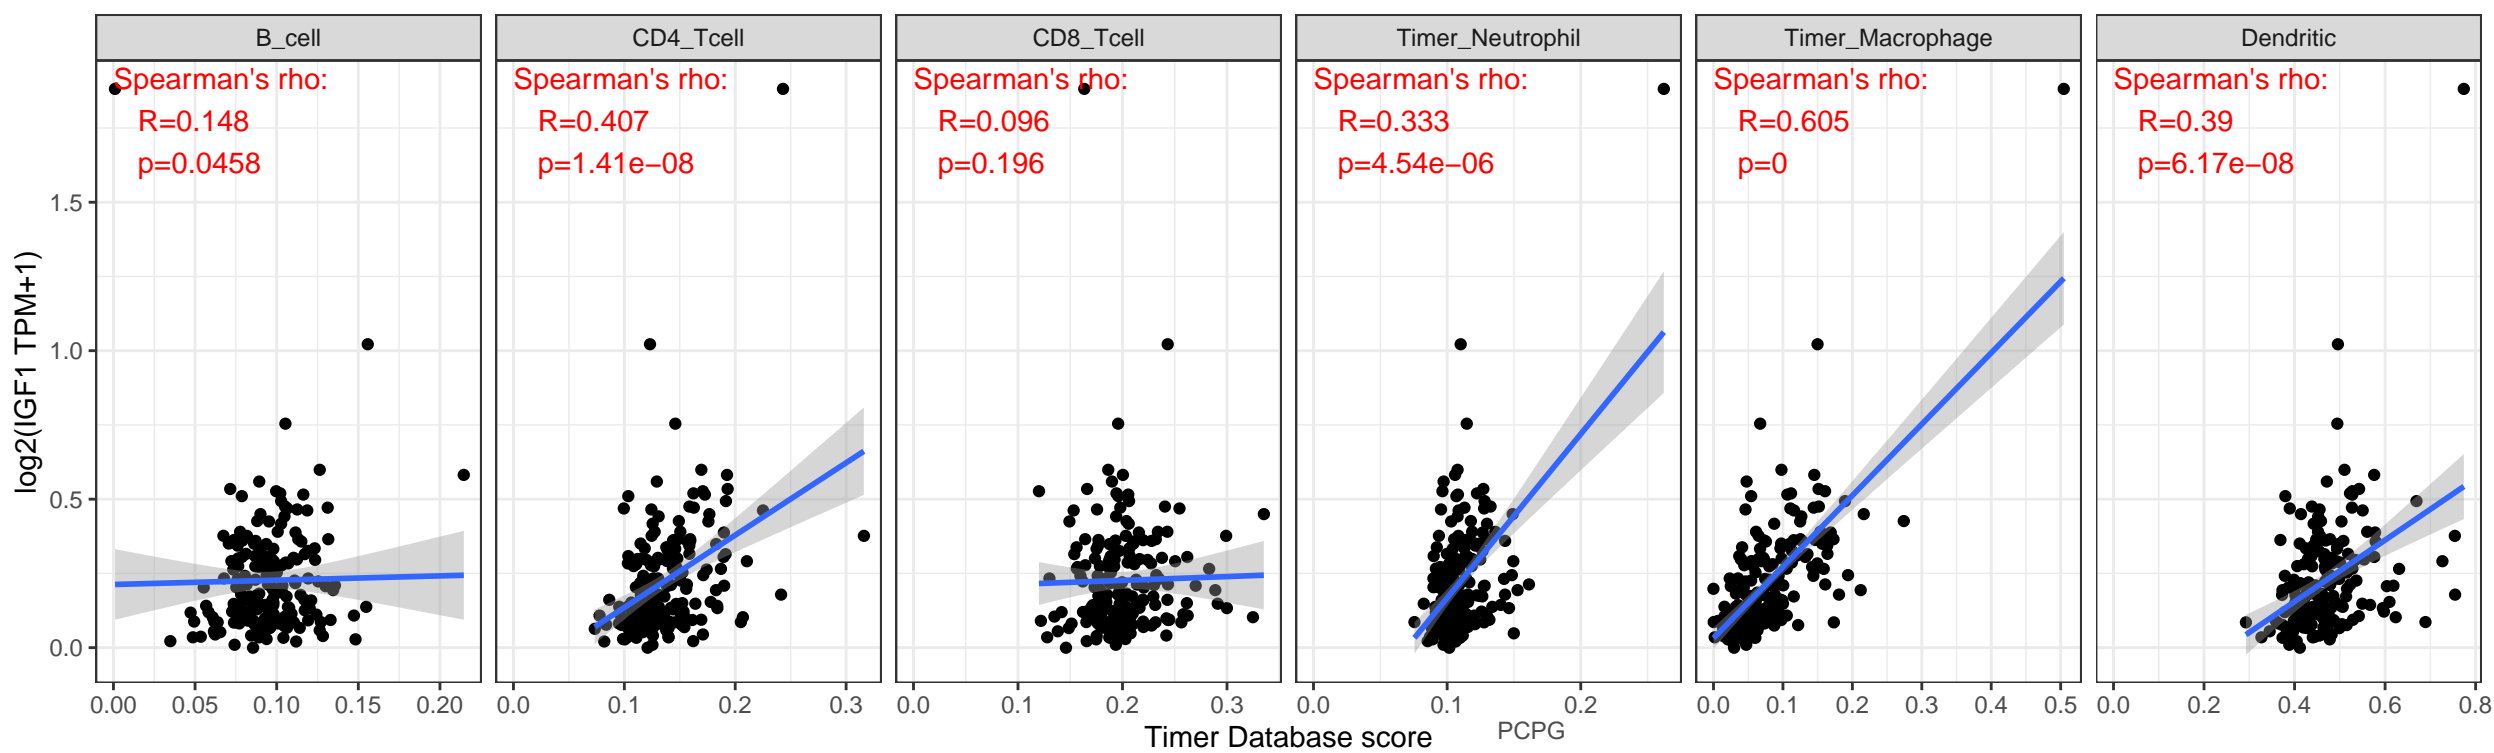

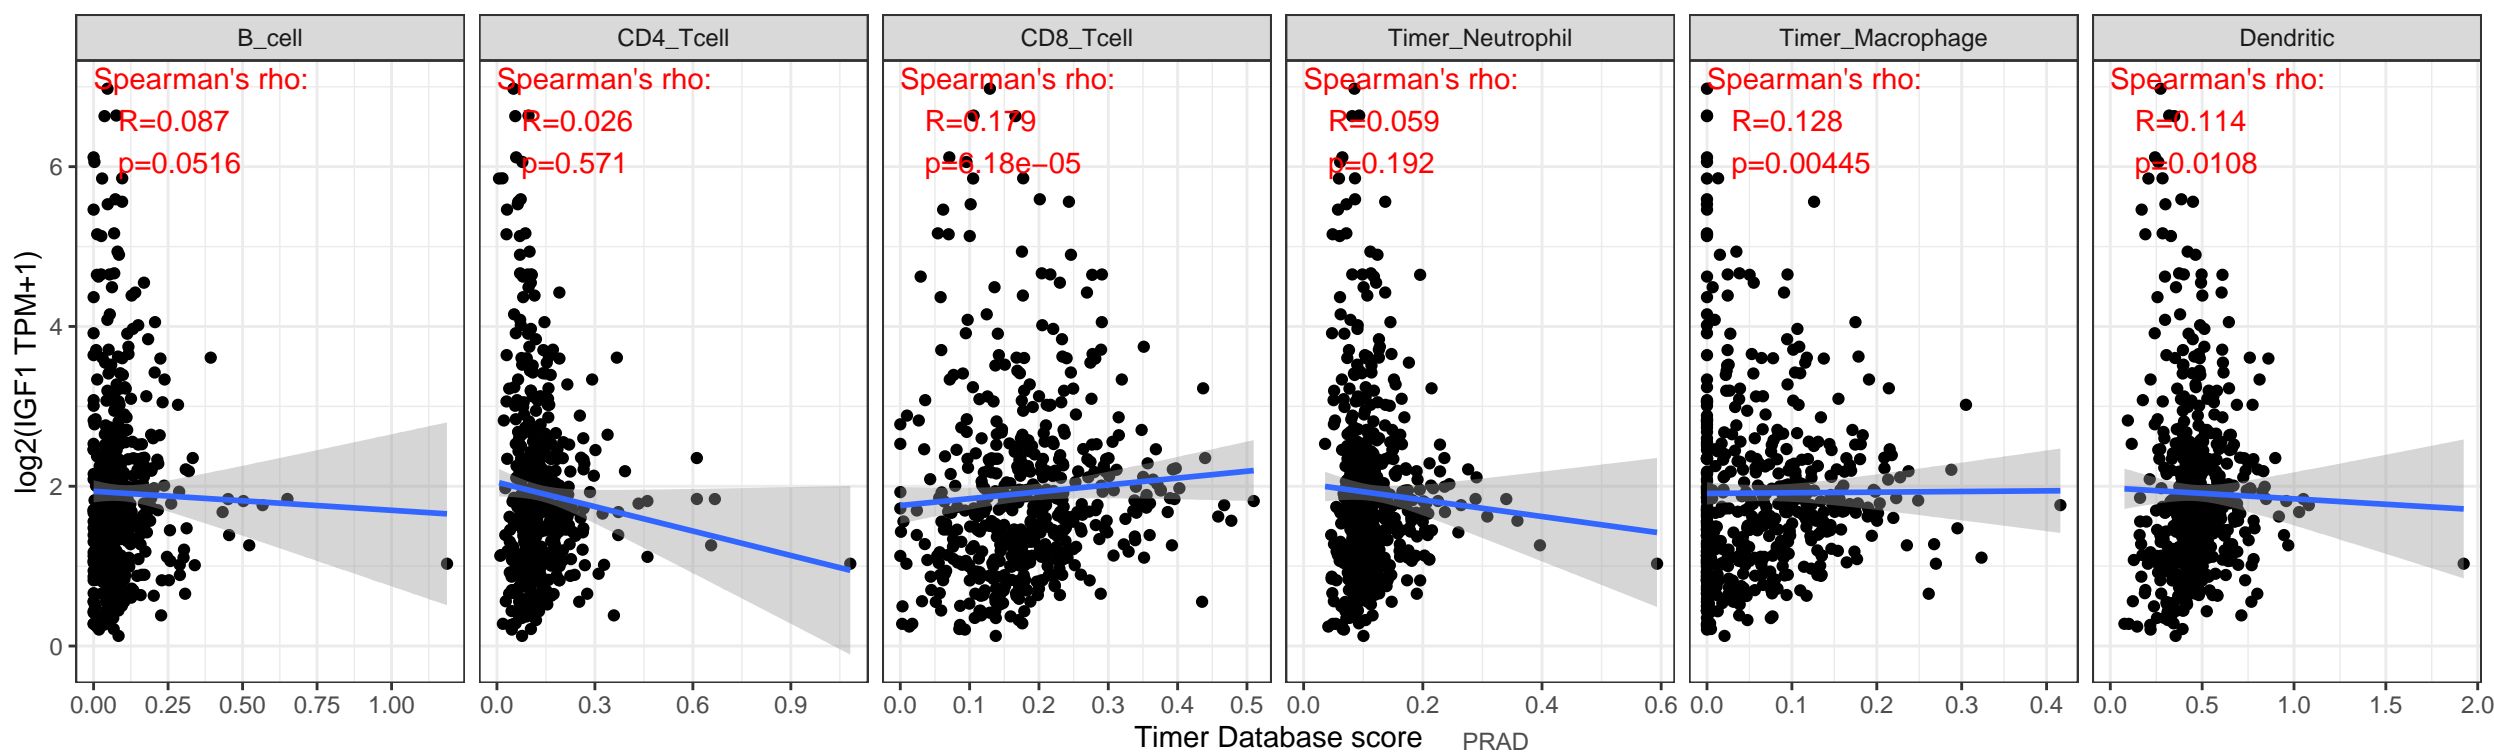

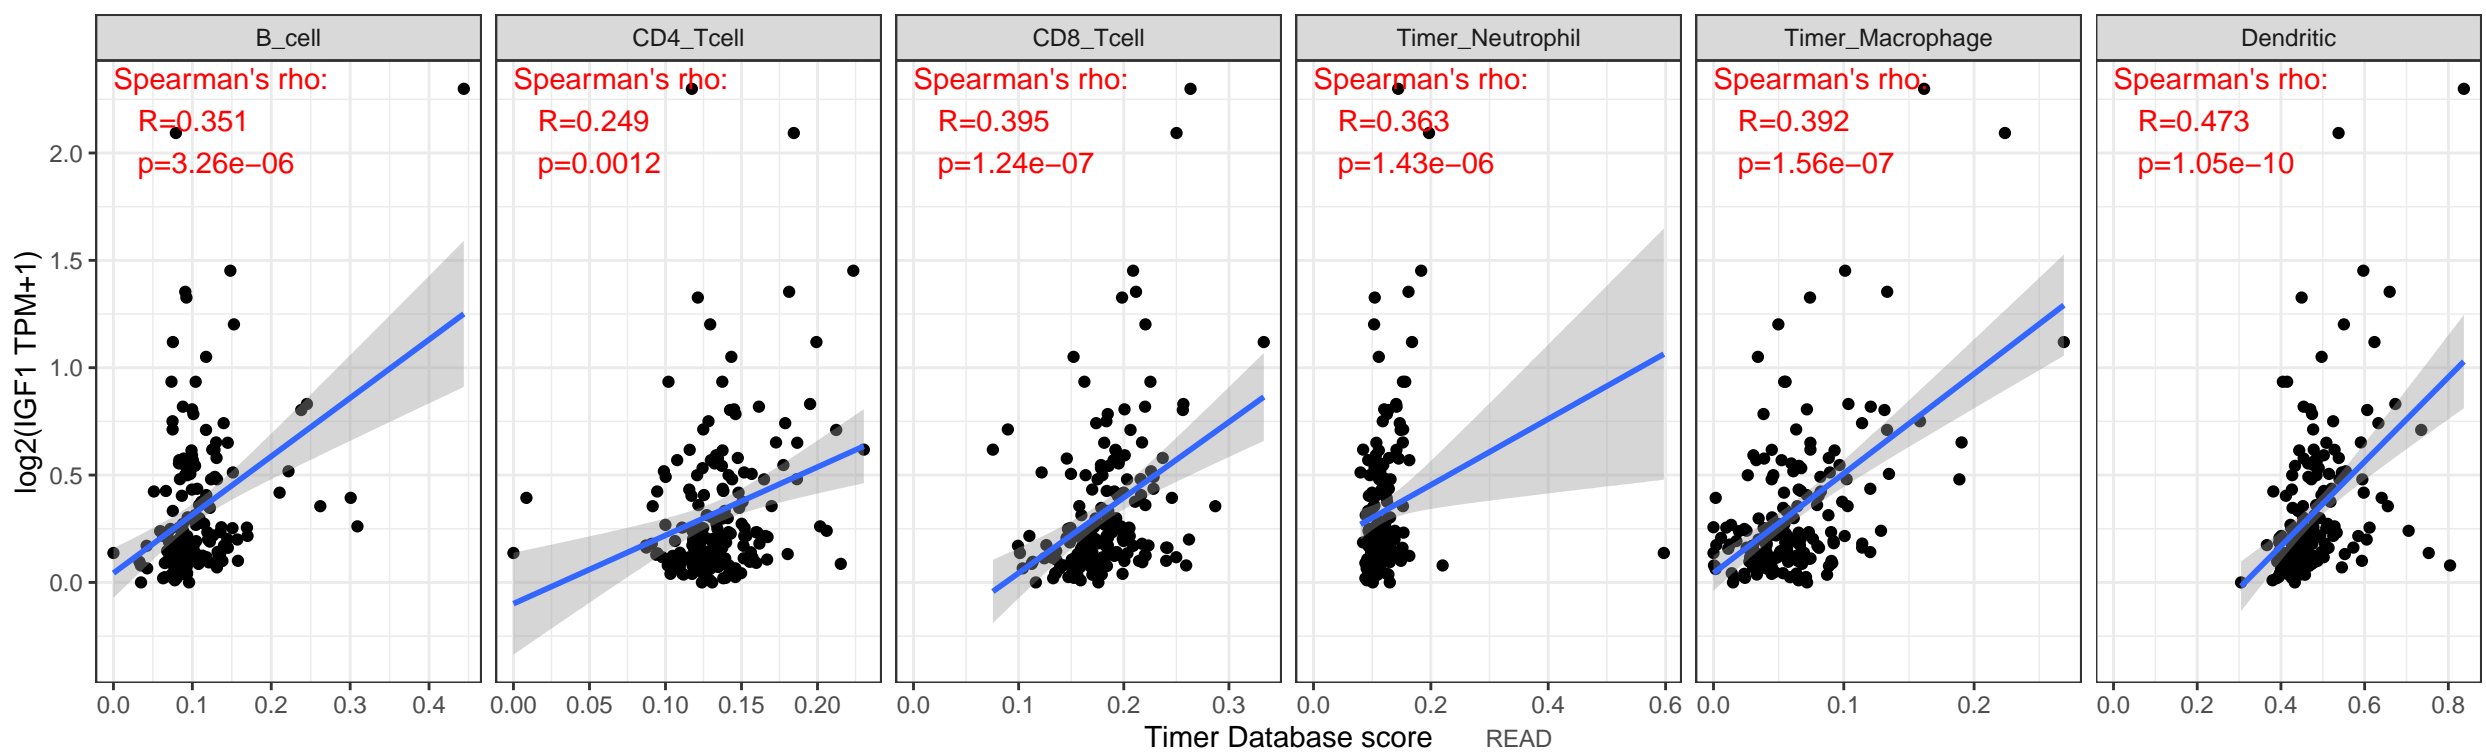

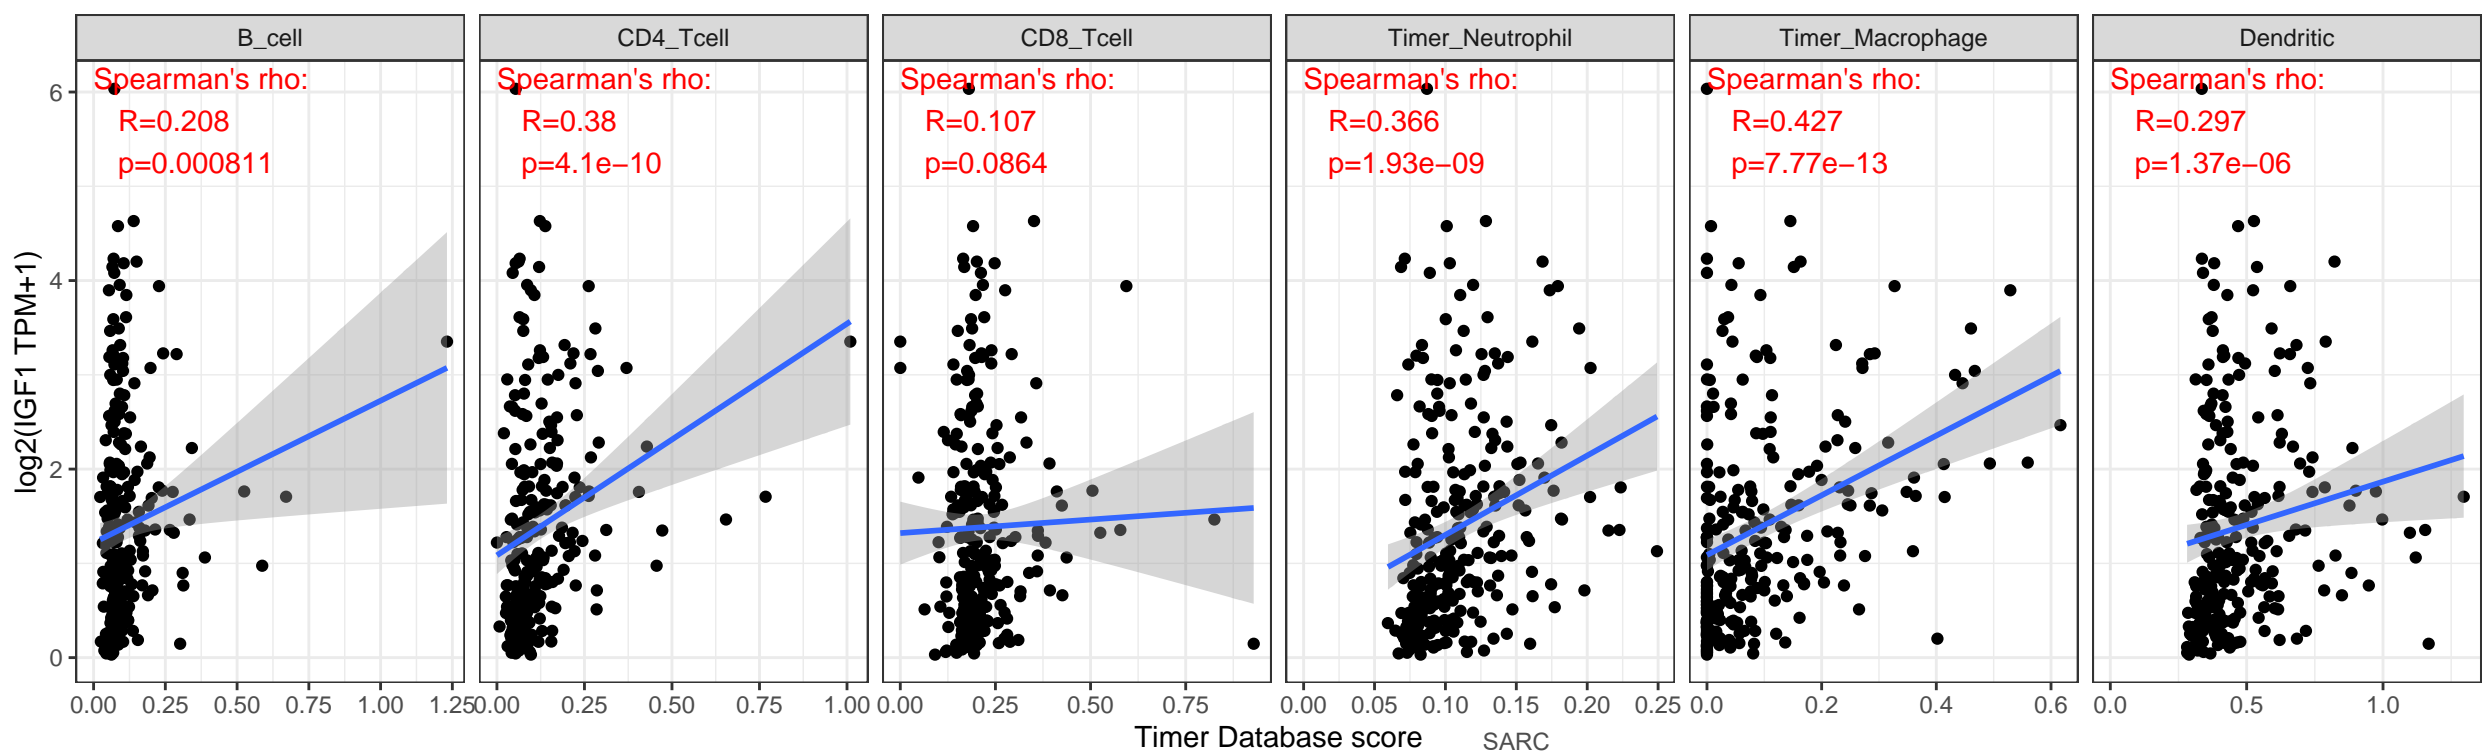



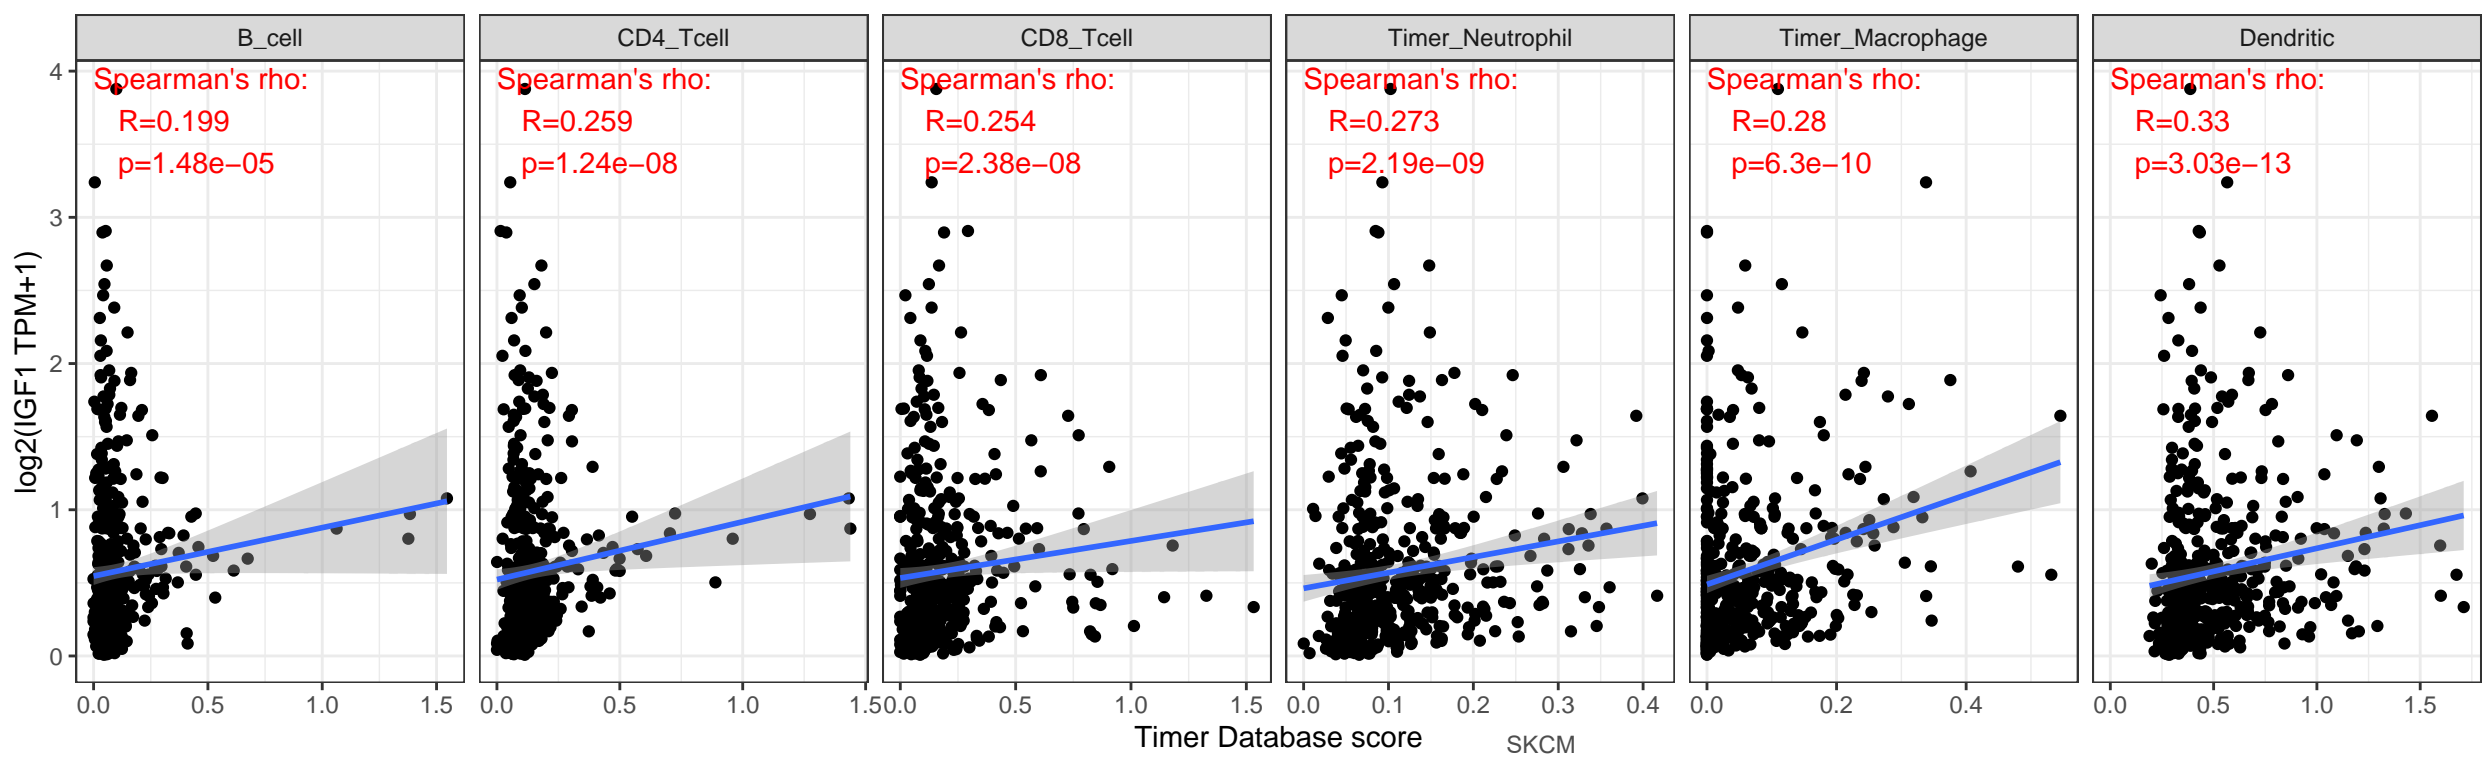

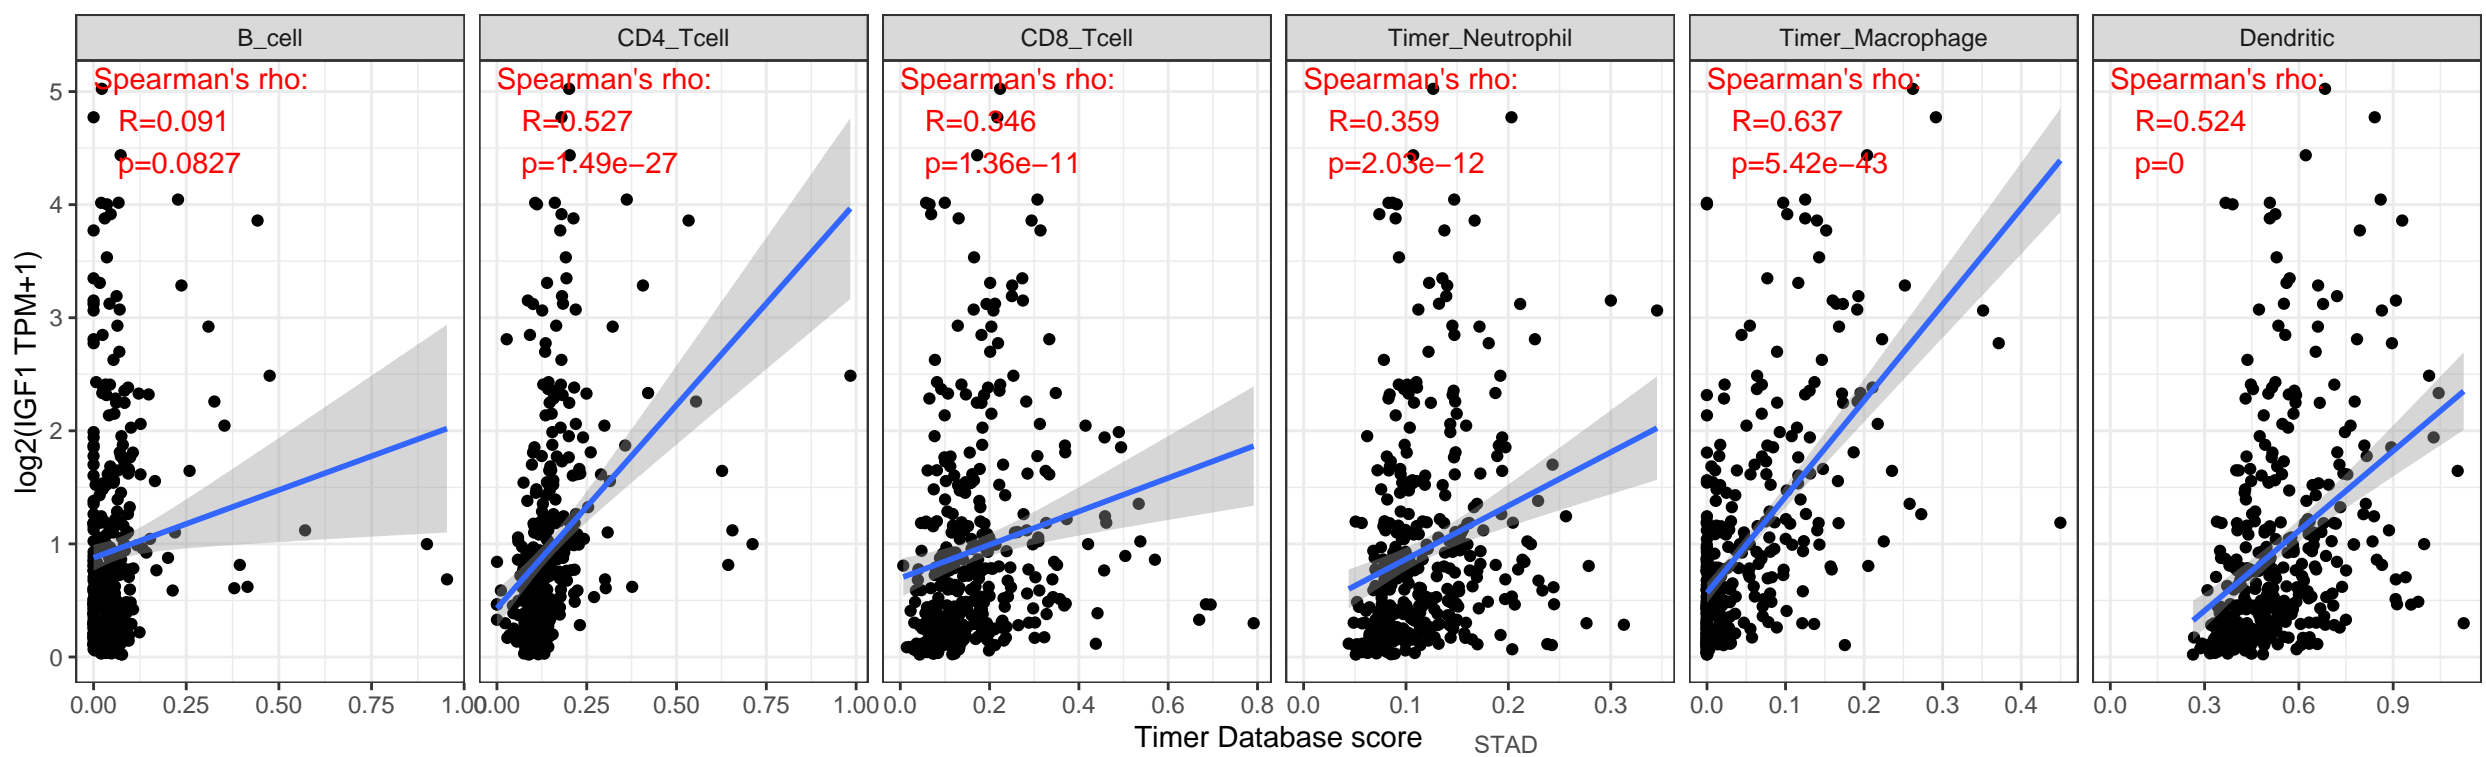

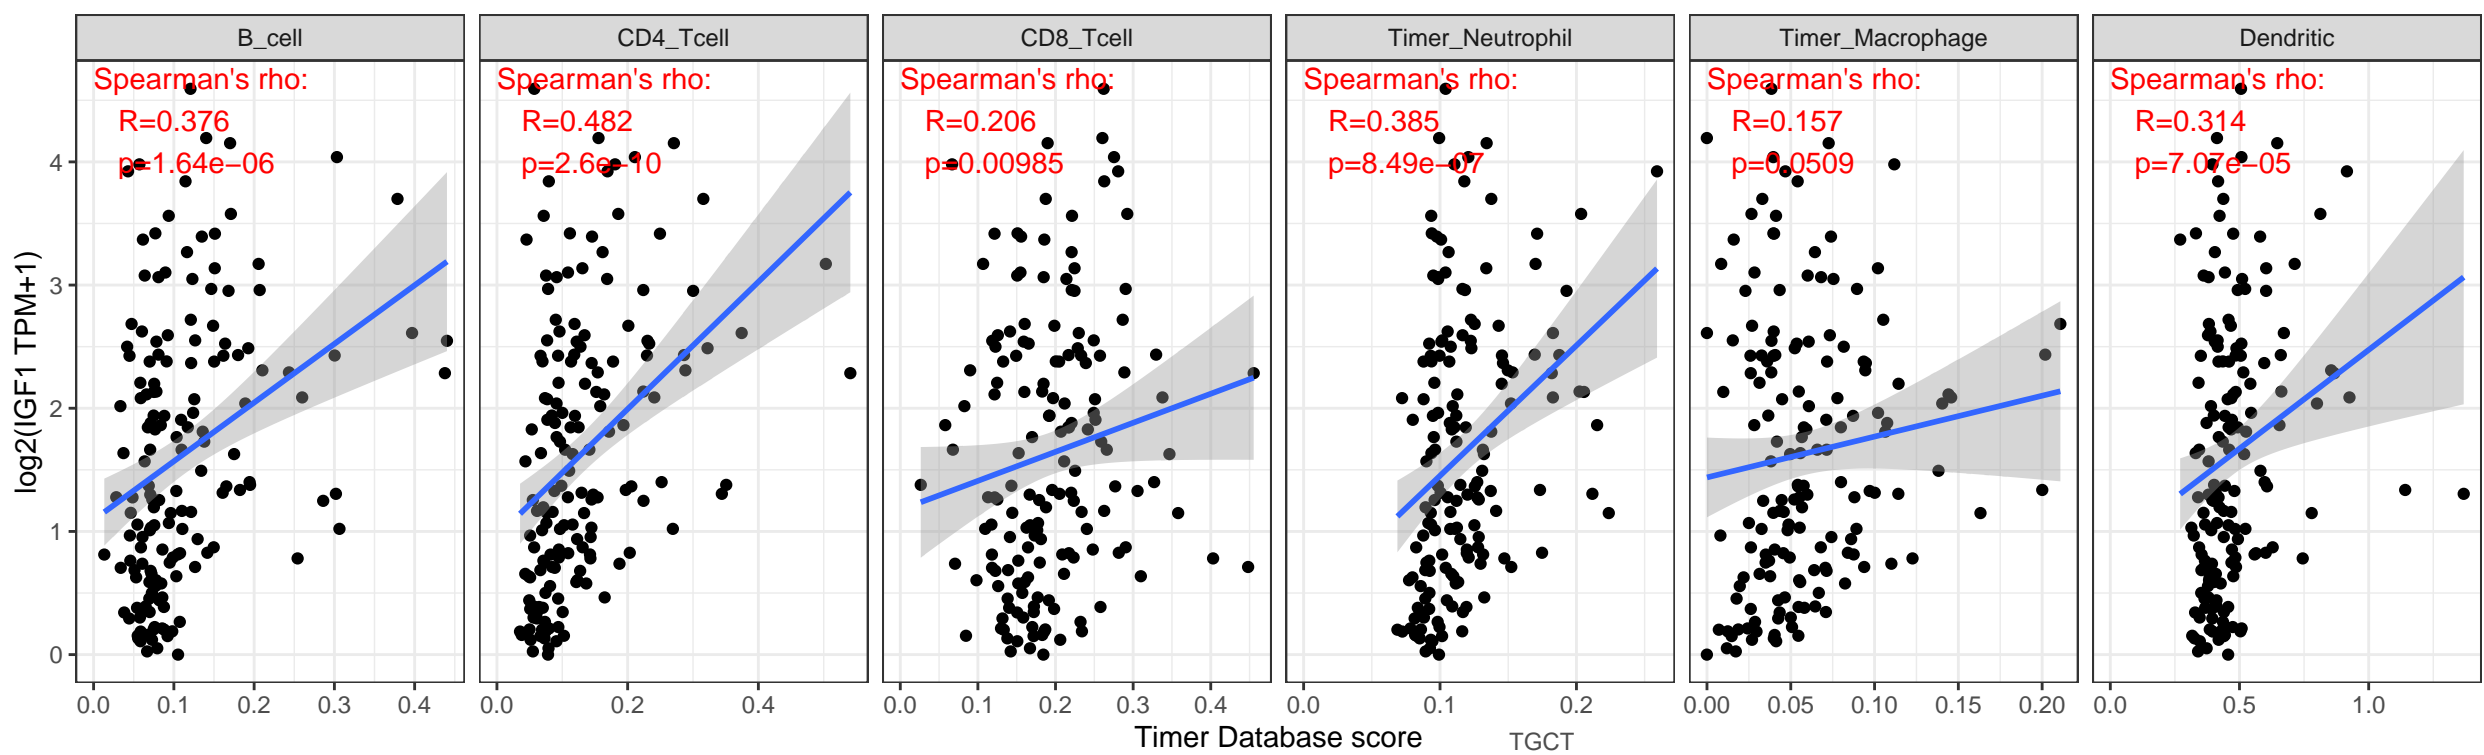

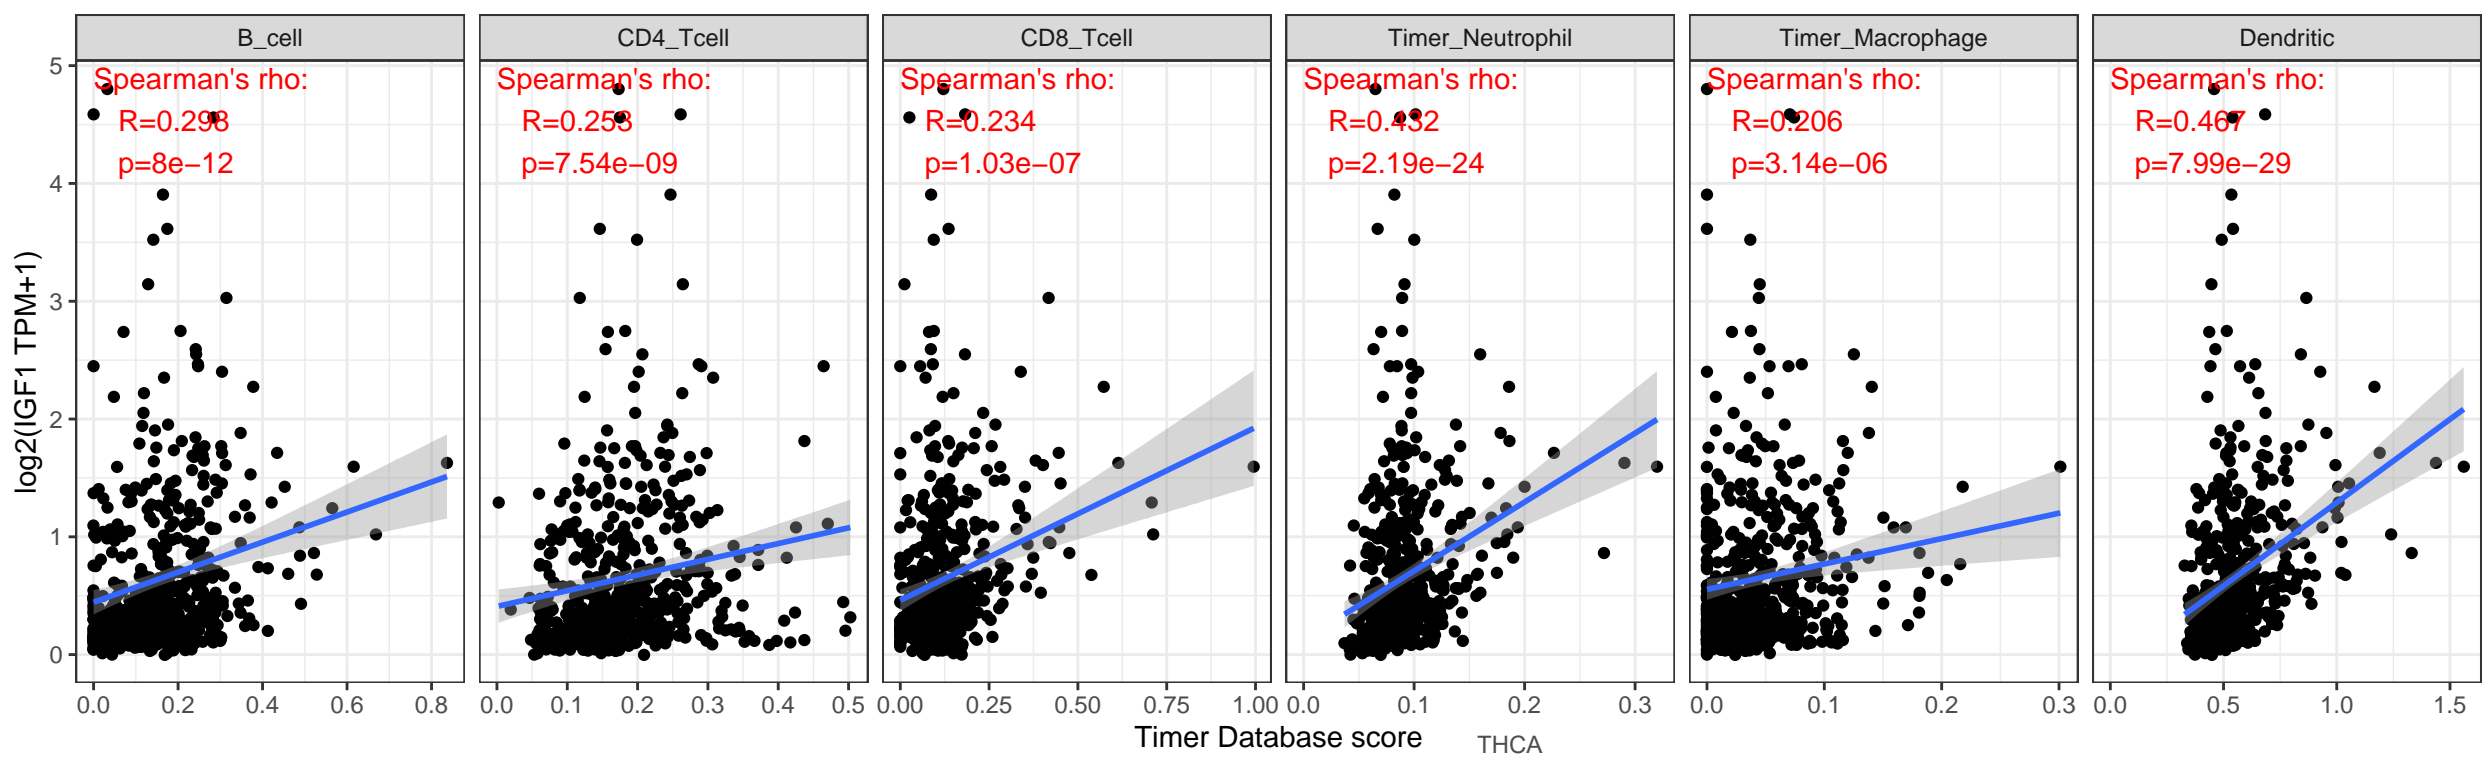

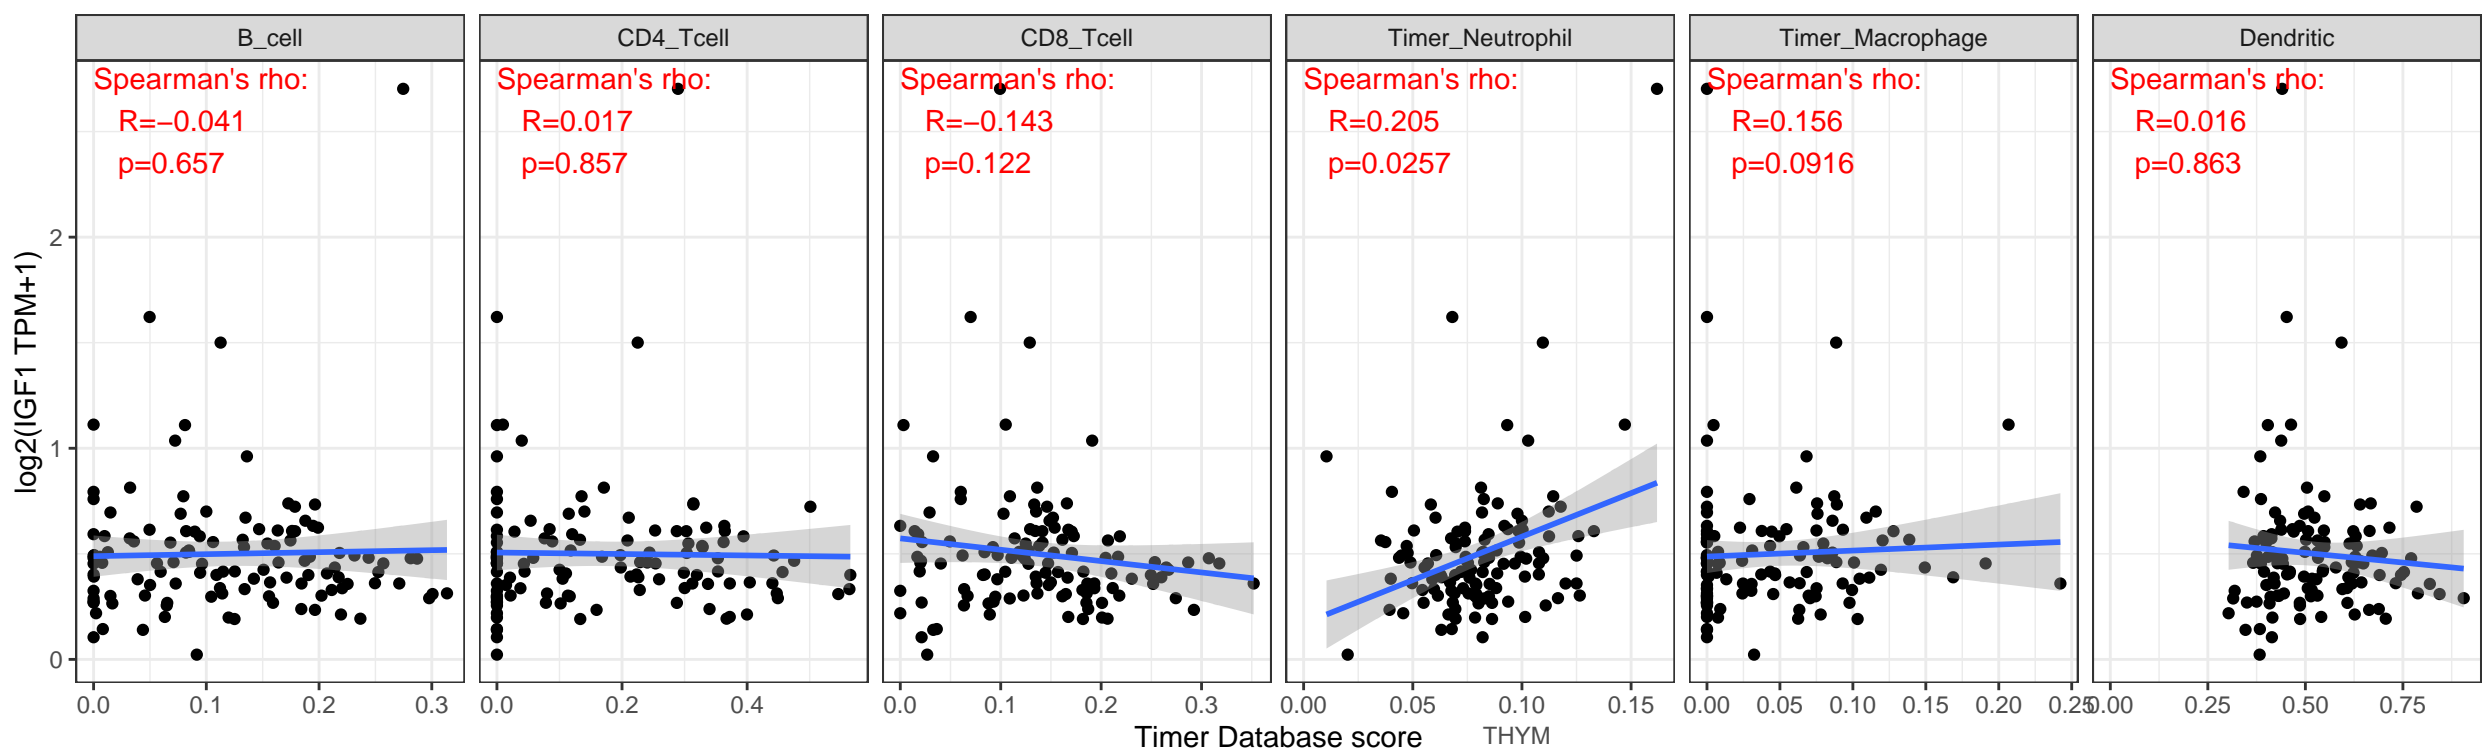

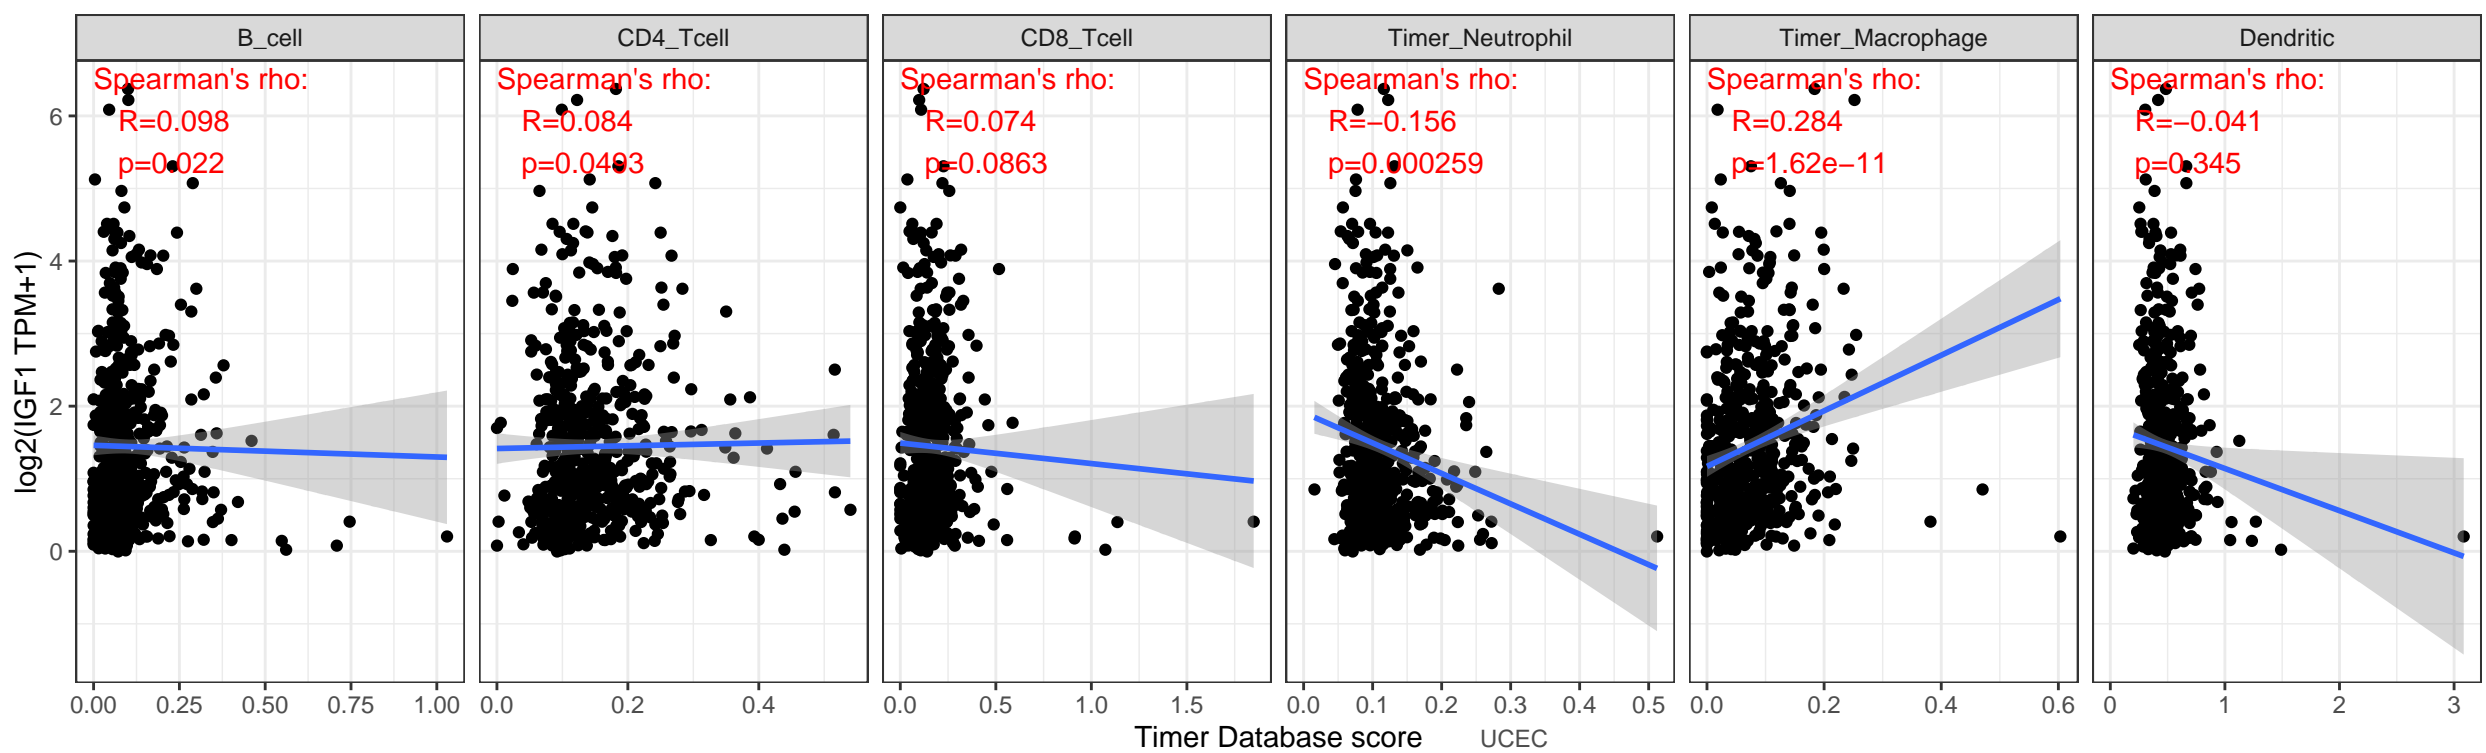

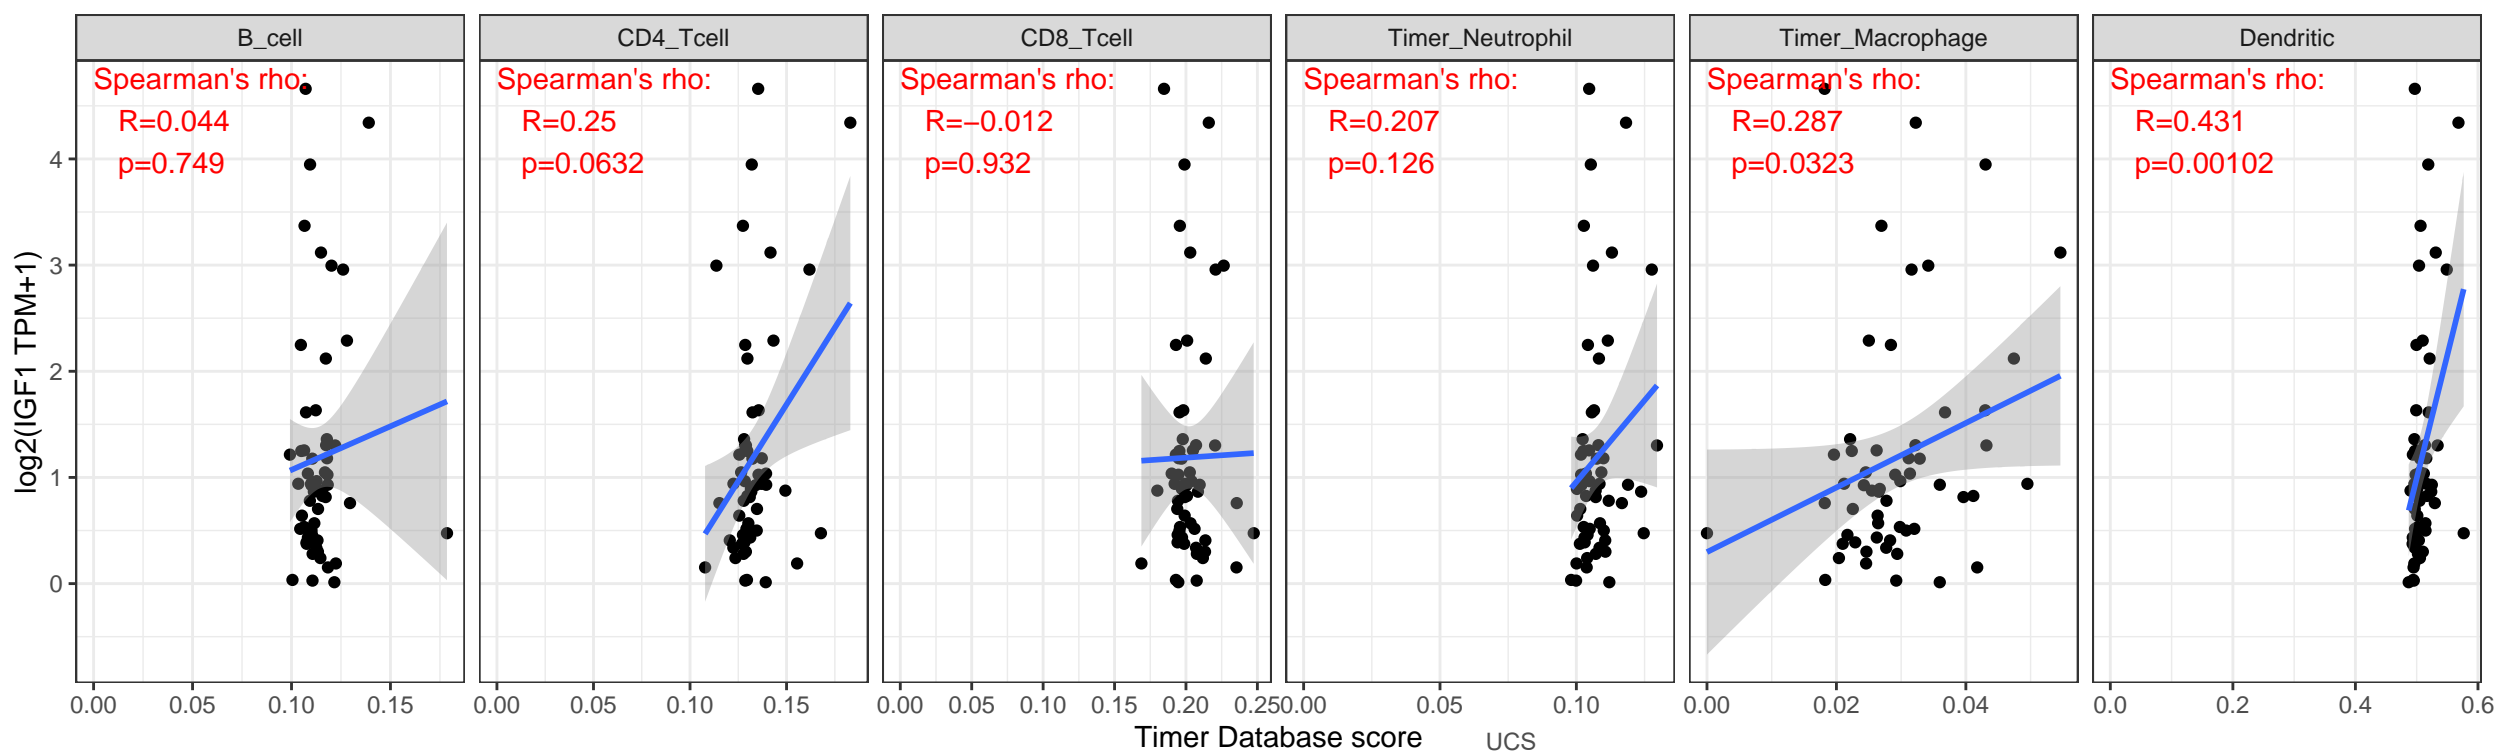

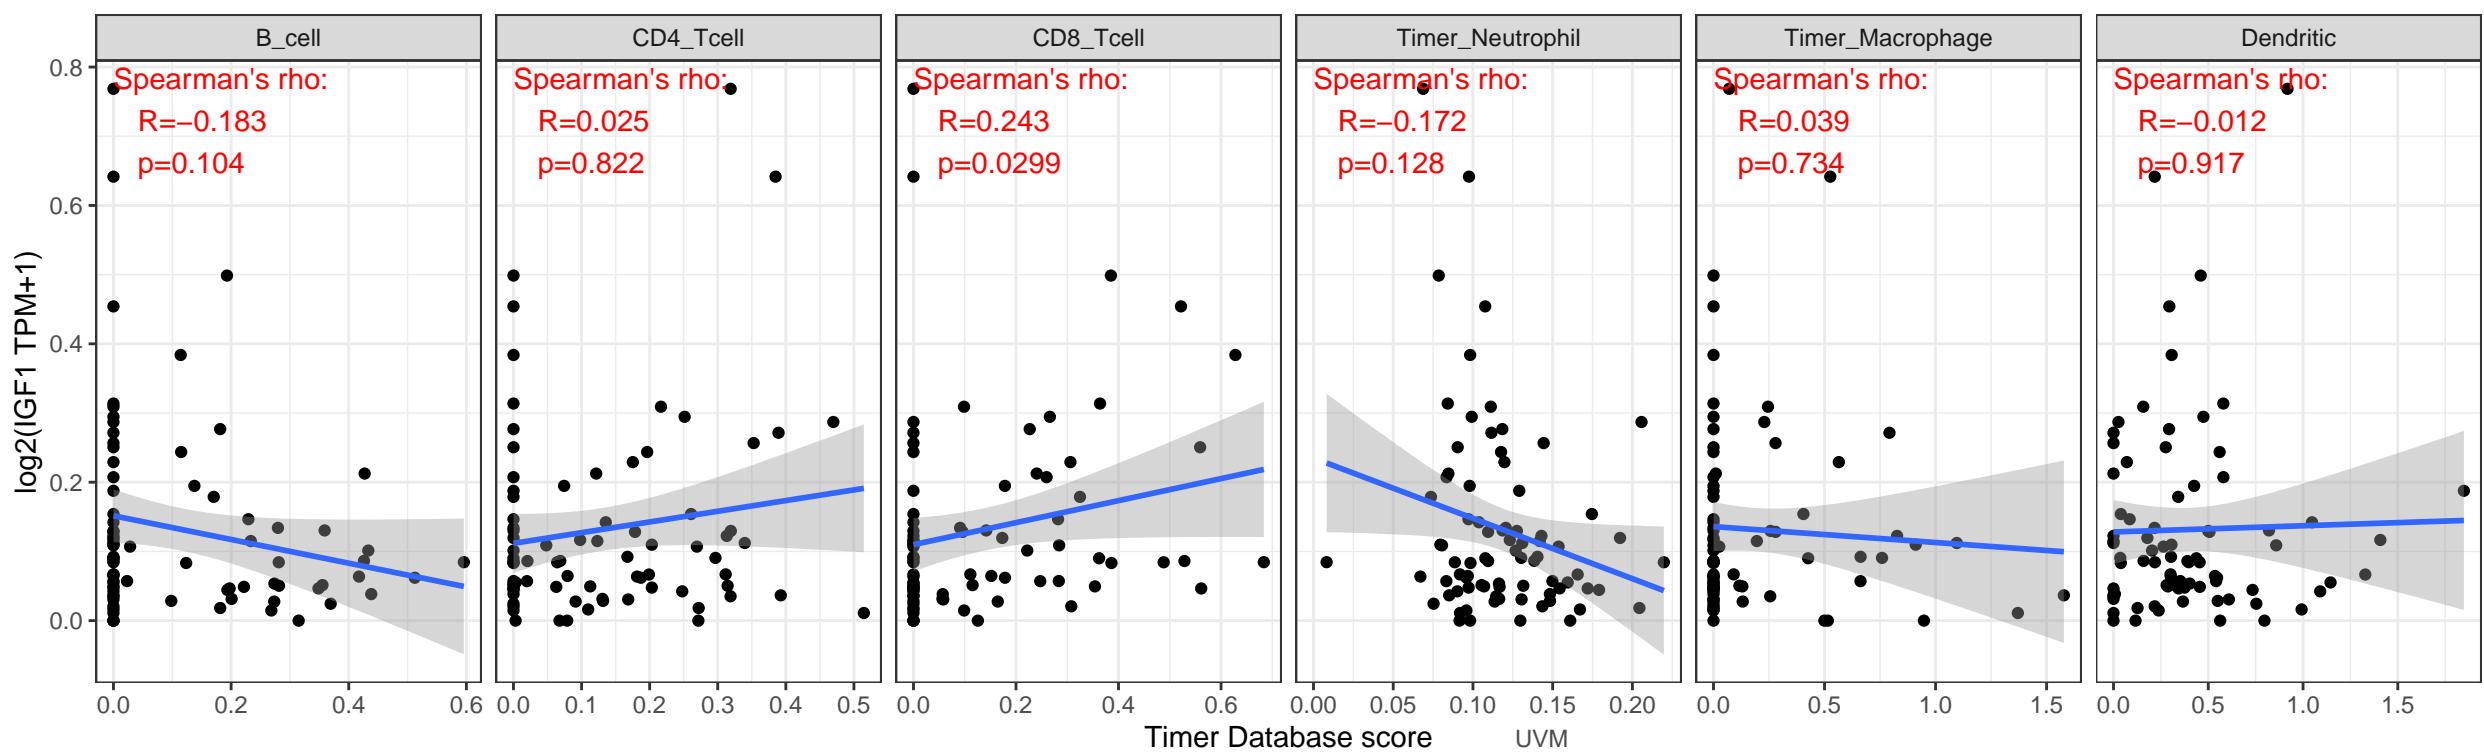

Supplement: DataSheet_3.pdf [file DataSheet_3.pdf]
